26 **Abstract**

27 Tanning response and melanocyte differentiation are mediated by the central transcription factor MITF.  
28 Enigmatically, these involve rapid and selective induction of melanocyte maturation genes, while  
29 concomitantly maintaining the expression of other effectors. In this study using cell-based and zebrafish  
30 model systems, we elucidate a pH mediated feed-forward mechanism of epigenetic regulation that enables  
31 selective amplification of melanocyte maturation program. We demonstrate that MITF activation directly  
32 elevates the expression of Carbonic Anhydrase 14 (Ca14) enzyme. Nuclear localized Ca14 increases the  
33 intracellular pH, resulting in the activation of histone acetyl transferase activity of p300/CBP. In turn  
34 enhanced H3K27 histone acetylation marks of select differentiation genes facilitates their amplified  
35 expression by MITF. CRISPR-mediated targeted missense mutation of CA14 in zebrafish results in  
36 immature acidic melanocytes with decreased pigmentation, establishing the centrality of this mechanism  
37 in rapidly activating melanocyte differentiation. Thereby we reveal a novel epigenetic control through pH  
38 modulation that reinforces a deterministic cell fate by altering chromatin dynamics.

39

40 **Introduction**

41 Gene expression networks as well as upstream pathways that govern their expression are well-studied for  
42 skin melanocytes (Bennett, 1983). Precursors of these cells are neural crest derived and are present in  
43 several locations in skin such as hair follicles, dermis and presumably the epidermis (Mort et al, 2015). In  
44 response to specific cues from the wnt and melanocortin pathways, these precursors are believed to  
45 migrate and rapidly mature into pigmented melanocytes in skin (Harris & Erickson, 2007).  
46 Microphthalmia associated transcription factor (MITF), the central melanocyte specific transcription  
47 factor is crucial for almost all aspects of development, maintenance and survival of melanocytes across  
48 vertebrates (Levy et al, 2006).

49 To mediate these wide ranging effector functions, the MITF target genes are selectively activated  
50 during specific melanocyte transitions (Levy & Fisher, 2011). The level and activity of MITF is governed  
51 by cAMP/PKA and MAPK signaling pathways respectively (Johannessen et al, 2013). M/E-box mediated  
52 direct activation is observed in several of the MITF target genes. Physical interaction of MITF with  
53 factors such as YY1 and proximal interplay with Sox10 mediates activation of a subset of these effector  
54 genes, thereby adding another layer of complexity to the selective activation (Li et al, 2012). Recruitment  
55 of transcriptional co-regulators such as BRG1 and p300/CBP facilitates dynamic interaction of MITF to  
56 subset of promoters (Sato et al, 1997). A key challenge still is to selectively activate certain gene modules  
57 dynamically, while maintaining other effector functions of MITF (Li et al, 2012; Praetorius et al, 2013).  
58 This is evident during tanning response and melanocyte differentiation wherein MITF activates  
59 pigmentation genes several folds, while maintaining the expression of proliferation and survival genes  
60 (Malcov-Brog et al, 2018). These recent findings highlights that multiple linked regulatory loops enable  
61 selective outcomes in pigmentation during tanning response. Basis of this selectivity by MITF and the  
62 mechanistic understanding is just beginning to emerge, wherein epigenetic factors are thought to play a  
63 class-specific activator role (de la Serna et al, 2006; Keenen et al, 2010; Laurette et al, 2015; Malcov-  
64 Brog et al, 2018). In this context, experiments by Laurette et al, followed by analysis by Malcov-Brog et

## pH regulates melanocyte maturation

65 al recently identified heightened H3K27 acetylation pattern in the pigmentation genes downstream of  
66 MITF.

67 Epigenetic regulation is likely to be intricately linked to cellular cues that cooperate with external  
68 signals in modulating networks involved in determining cell fates. pH homeostasis is a crucial biological  
69 process that is linked to several of the cellular pathways and is a plausible candidate (Boron, 2004)  
70 (Simons et al, 2009; Tatapudy et al, 2017) . While the centrality of pH balance in cell homeostasis is well  
71 appreciated, emerging evidence indicate that pH could signal cellular events by programmatically  
72 modulating existing networks (McBrian et al, 2012; Tatapudy et al, 2017). An increase in the intracellular  
73 pH is critical for the differentiation of mouse embryonic stem cells as well as drosophila adult follicle  
74 stem cells, highlighting the role of pH in controlling key cell fates (Ulmschneider et al, 2016).

75 A large family of carbon dioxide metabolizing enzymes, carbonic anhydrases (CA) regulate pH  
76 across life forms (Lindskog, 1997). Members of this family are ubiquitously expressed in many cell types  
77 and localize to distinct subcellular compartments (Karler & Woodbury, 1960; Reibring et al, 2014). CA14  
78 is a type I transmembrane protein expressed in a variety of cell types but has been studied in retina, brain,  
79 kidney, smooth muscle and cardiomyocytes (Fujikawa-Adachi et al, 1999; Kaunisto et al, 2002). Studies  
80 using knock-out mice have established a role of CA14 in buffering alkaline shifts in brain (Shah et al,  
81 2005). Intracellular expression of CA14 in the sarcolemma of smooth muscle cells is known to modulate  
82 impulse induced muscle contractions (Wetzel et al, 2007). Cells of the Retinal Pigmented Epithelium  
83 (RPE) demonstrate high expression of CA14 on the apical region and *Cal4* knock out mouse is deficient  
84 in eliciting a functional retinal light response (Ogilvie et al, 2007).

85 The emerging link between pH and melanin synthesis is several fold. The enzymes involved in  
86 melanogenesis namely tyrosinase (Tyr), tyrosinase related protein (Trp1) and dopachrome tautomerase  
87 (Dct) that reside within the melanosomes is modulated by the luminal pH. V-type ATPases are involved in  
88 maintaining an acidic pH of these lysosome related organelles. Optimal pH for melanogenesis has  
89 remained controversial and marginal luminal alkalization by protonophores is thought to promote  
90 melanin synthesis (Watabe et al, 2004). pH changes in the endolysosomal compartments also alter the



## pH regulates melanocyte maturation

91 trafficking and maturation of melanosomal enzymes in addition to their activity, as well as the type of  
92 melanin being synthesized (Halaban et al, 2002), (Bellono et al, 2014), (Wakamatsu et al, 2017).  
93 Predictable alterations of the cellular pH modulate the resultant pigmentation in melanocytes. The effect  
94 of which is surprisingly high with a robust alteration in the net melanin synthesis. Therefore we decided  
95 to systematically study the interplay of pH on the entire melanogenic program at various levels.

96 In this study we demonstrate that intracellular pH is a critical cue for amplifying the melanocyte  
97 maturation program. We trace genes that follow a concordant pattern of regulation with pigmentation and  
98 identify Carbonic Anhydrase 14 to be a MITF regulated gene. CA14 acts as a feed forward activator of  
99 MITF regulatory network and amplifies the melanocyte maturation gene expression by altering the  
100 histone acetylation marks via a programmed intracellular pH change. Using cell-based and zebrafish  
101 model systems we demonstrate that the feed forward loop involving Ca14 is critical to mediate the  
102 melanocyte maturation program downstream of MITF.

103 **Results**

104 *Alkaline intracellular pH induces pigmentation by enhancing the melanogenesis gene expression*

105 During the culture of B16 cells in DMEM medium CO<sub>2</sub>-HCO<sub>3</sub><sup>-</sup> buffering system maintains media pH.  
106 Hence we resorted to establish the pH-pigmentation link by modulating the prevailing CO<sub>2</sub> levels. We set  
107 up progressive pigmentation using the B16 cells as described earlier (Natarajan et al, 2014). In this set up  
108 the cells progressively activate the melanogenesis gene expression program and increase pigmentation  
109 over a course of 8 to 12 days. To alter the pH, 10% CO<sub>2</sub> levels were tested. We measured the extracellular  
110 pH (pH<sub>e</sub>) using the standard pH electrode under controlled conditions of temperature and CO<sub>2</sub> saturation.  
111 While the cells grown in 5% CO<sub>2</sub> showed an increase in pH<sub>e</sub> from around 7.4 to 7.8 on day 4 after  
112 induction of the pigmentation program, the 10% CO<sub>2</sub> sustained a constant pH of around 7.4  
113 (**Supplementary Fig 1A**). This trend was reflected in the intracellular pH (pH<sub>i</sub>), which is close to 7.9 on  
114 day 4 under the routine 5% CO<sub>2</sub> condition. However, under the 10% CO<sub>2</sub> the pH remained close to 7.0,  
115 similar to the day 0 where the cells are depigmented (**Fig 1A**). When the cells were assessed for the  
116 cumulative accumulation of melanin on day 8, under the 10% CO<sub>2</sub> condition we observed depigmented  
117 cells (**Fig 1B**). Melanin content assay performed using synthetic melanin standard confirmed that the  
118 level of melanin is significantly low (**Supplementary Fig S1B**). Further electron microscopic evaluation  
119 of day 8 cells confirmed that indeed melanin laden stage III and IV melanosomes are dramatically  
120 reduced under these conditions (**Fig 1C**).

121 We then analyzed steady state protein levels of the components of melanosomal machinery. All  
122 the three pigmentation proteins Tyr, Dct and Gp100 were drastically reduced under 10% CO<sub>2</sub>, however  
123 the levels of MITF were not decreased, rather we observed a mild increase in the level of this central  
124 transcription factor (**Fig 1D**). In concordance with earlier studies that suggested a pH dependent alteration  
125 in the protein stability, the activity of tyrosinase enzyme assessed by L-DOPA based in-gel assay as well  
126 as western blot analysis confirmed a dramatic reduction (Halaban et al, 2002). However a decrease in Dct  
127 and Gp100 levels was unanticipated. Gp100 showed a greater decrease on day 8 and had comparable  
128 level on day 4 with alterations in the mobility suggesting processing differences (Hoashi et al).

## pH regulates melanocyte maturation

129 Surprisingly, transcript levels of these downstream pigmentation genes were lower in 10% CO<sub>2</sub>  
130 condition (**Fig 1E**). We therefore identified that retaining the cells in an acidic state of pH<sub>i</sub>, suppresses  
131 pigmentation by the decreased expression of pigmentation genes despite comparable levels of MITF. We  
132 also observed an increase in the cell numbers at 10% CO<sub>2</sub> (**Supplementary Fig S1C**). Therefore there is  
133 seemingly an additional level of cellular program by intracellular pH that governs melanogenesis beyond  
134 enzyme activity and protein stability, involving transcriptional regulation.

135

### 136 *A candidate effector CA14 follows a concordant expression pattern with pigmentation genes*

137 We set out to identify the molecular mechanism behind the pH dependent transcriptional response. Based  
138 on our earlier work, we had established the B16 cell autonomous model and demonstrated the utility of  
139 this model to identify underlying networks that govern pigmentation. The other model involves the  
140 growth of pigmented melanoma tumor derived from mice and grown *in vitro* for four consecutive  
141 passages. A set of genes showed a concordant regulation across the two reversible models  
142 (**Supplementary Fig S2**). Among the common set of regulated genes, five of the fifty candidates, *Tyr*,  
143 *Tyrp1*, *Mlana*, *Mcoln3*, *Si* and *Rab27a* are targets of the central melanocyte transcription factor MITF.  
144 These are well-known pigmentation genes directly involved in the process of melanogenesis and  
145 melanosome maturation, which are directly linked to the process of melanocyte differentiation. From this  
146 analysis Carbonic anhydrase 14 emerged as a putative candidate gene that could directly regulate pH, as it  
147 is regulated with pigmentation in both the cellular model systems.

148 We then analyzed the pattern of expression of carbonic anhydrases from the data and observed  
149 that of the several CAs expressed in melanocytes, only CA14 showed regulation pattern similar to the  
150 melanocyte differentiation genes *tyr*, *dct* and *tyrp1* based on microarray studies (**Fig 2A**) (Natarajan et al,  
151 2014). Hence we proceeded to characterize the regulation of Ca14 with an aim to establish its role in  
152 melanocyte maturation.

153

### 154 *CA14 expression is induced upon activation of the melanocortin pathway via MITF*

## pH regulates melanocyte maturation

155 As *Ca14* showed concordant expression with pigmentation genes and correlated with the activity of MITF,  
156 we set out to identify whether *cal14* is indeed a downstream gene and could play an important role in  
157 mediating the effects of MITF in melanocytes. Overexpression of *Mitf*, followed by global gene  
158 expression analysis revealed a set of regulated genes (Hoek et al, 2008). Chromatin immunoprecipitation  
159 studies have independently identified several promoters occupied by this transcription factor (Strub et al,  
160 2011). Combined analysis of both these approaches resulted in a set of genes enriched in known targets of  
161 *Mitf*, along with several other putative candidates. In this set of genes *Ca14* features and hence emerged  
162 as a promising downstream target of MITF.

163  $\alpha$ -melanocyte stimulating hormone ( $\alpha$ -MSH) and Iso-Butyl Methyl Xanthine (IBMX) were used  
164 as inducers of *Mitf* to stimulate melanocytes (Motiani et al, 2018). We carried out these experiments in  
165 mouse Melan-A cells, as well as the primary human melanocytes. Treatment of Melan-A cells with 60  
166  $\mu$ M IBMX or 1  $\mu$ M  $\alpha$ -MSH for 48h and 72h resulted in the induction of *Mitf* and the downstream target  
167 gene *Dct*, confirming activation of the melanocortin pathway. The antibody used to detect CA14 was  
168 validated by western blot analysis wherein we could identify the 25 kDa form of CA14 protein. The  
169 intensity of the band was reduced upon silencing with a pool of siRNA against *Ca14* and increased with  
170 expression of CA14 ORF in an expression vector, confirming specificity of the antibody (**Supplementary**  
171 **Fig S3 A & B**). With IBMX as well as  $\alpha$ -MSH treatments we could observe elevation of the 25kDa form  
172 of *Ca14* protein, indicating that activation of *Mitf* mediates *Ca14* induction (**Fig 2B**). We observed a  
173 similar induction of CA14 in primary human melanocytes treated with IBMX for 48 h (**Fig 2C**).

174 We performed qRT-PCR analysis to monitor the mRNA levels in B16 cells treated with  $\alpha$ -MSH  
175 for 12 and 24h, as the transcript-level changes are expected earlier than protein level changes. We  
176 observed a robust elevation in the expression of pigmentation gene transcripts *Tyr*, *Dct* and *Trp1*.  
177 Moreover the elevation in *Mitf* and *Ca14* levels were comparable, modest but significant (**Fig 2D**).

178

179 ***MITF directly binds to Ca14 promoter and regulates its expression***

## pH regulates melanocyte maturation

180 To probe the induction of *cal4* by *Mitf* further, we cloned 3 kb upstream region of *cal4* in a reporter  
181 vector and performed dual luciferase assays. Substantial elevation of reporter activity with IBMX and  $\alpha$ -  
182 MSH was observed confirming that the induction to be a transcriptional response (**Fig 2E**). Analysis of  
183 MITF binding sites in the promoters of *Ca14* gene indicated multiple sites in both the human and mouse  
184 promoter regions (**Supplementary Fig S4**). To fine-map the responsive site we adopted two strategies, in  
185 the first strategy we created three clones of mouse *Ca14* promoter carrying the 1kb transcription start site  
186 proximal region, the mid or the distal 1 kb region (**Fig 2E**). Luciferase assays confirmed that the IBMX  
187 inducibility was present in the proximal and the distal regions whereas the middle 1 kb promoter sequence  
188 was not IBMX inducible.

189 Further, chromatin immunoprecipitation using C5 monoclonal antibody to MITF demonstrated  
190 binding to 3kb as well as the proximal and distal regions was observed. Comparable binding of *Mitf* to  
191 the intronic site in *Ca14* gene as well *Tyrp1* and *Cdk2* promoters confirmed direct binding of MITF to  
192 *Ca14* for its regulation. However the middle region did not show appreciable binding of MITF (**Fig 2F**).  
193 We propose that there are multiple binding sites within the *CA14* promoter responsible for its direct  
194 induction by MITF. Finally, *Mitf* dependence of *cal4* expression was probed by the downregulation of  
195 this transcription factor by siRNA followed by western blot analysis. While the known downstream *Mitf*  
196 target gene *Dct* was dramatically downregulated, both *Mitf* and *Ca14* showed a comparable  
197 downregulation of around 80% (**Fig 2G**). Similar observations were made from primary human  
198 melanocytes using a siRNA against human *Mitf*, confirming the *Mitf* dependency of *CA14* expression  
199 (**Fig 2H**). Hence we establish that melanocyte differentiating melanocortin signaling pathway controls  
200 *Ca14* expression in a MITF dependent manner in both mouse as well as human cells.

201

### ***CA14 is essential for melanocyte maturation in zebrafish***

203 In cultured melanocytes pH is governed by prevailing CO<sub>2</sub> concentrations which may override  
204 intracellular pH programs. Therefore to address the role of *CA14* on melanocyte functions we utilized a  
205 morpholino (MO) based transient silencing approach using the zebrafish model system. Herein the

## pH regulates melanocyte maturation

206 pigment producing cells termed melanophores are ontologically equivalent to higher vertebrate  
207 melanocytes and the underlying gene networks are highly conserved. During embryogenesis  
208 melanophores rapidly mature between 48 to 72 hours post fertilization (hpf). Additionally in the absence  
209 of melanosome transport, melanocyte maturation is easy to visualize and monitor.

210 After titrating the dose of the Ca14 MO based on viability of embryos, scoring of the phenotypes  
211 was carried out (**Supplementary Fig S7**). Analysis of melanophores at 48 hpf indicated that the *ca14*  
212 morphants were lightly pigmented compared to control non-targeting MO-injected embryos at the same  
213 concentration (**Fig 3A & C**). To assess melanophore numbers, we generated morphants in transgenic  
214 zebrafish line *Tg:tyrp1-GFP* wherein the melanophores are fluorescently marked with GFP driven by a  
215 fugu *Tyrp-1* promoter (Zou et al, 2006). To prevent masking of GFP fluorescence by melanin, the  
216 embryos were treated with phenylthiourea (PTU), a potent tyrosinase inhibitor. Similar pattern of  
217 melanophore positioning and comparable number of melanophores were observed in the morphant fishes  
218 suggesting that the melanophore numbers are unaltered which indicates melanocyte specification and  
219 survival are unaffected (**Fig 3B** right panel & **3D**). However, the mature heavily pigmented melanophores  
220 were drastically reduced in the *ca14* morphants. Quantitation of the bright field images using Image J  
221 platform suggested that the morphant melanophores had a higher mean grey value, indicating that they  
222 were lighter with less melanin content (**Fig 3C**). These observations strongly suggest that CA14 plays an  
223 important role in the process of melanogenesis, a crucial event associated with melanocyte maturation.  
224 Furthermore, upstream events such as specification, migration and patterning of melanocytes are  
225 seemingly unperturbed. We observed a progressive increase in the expression of pigmentation genes *tyr*,  
226 *dct* and *tyrp1b*, concomitant with the known melanocyte maturation process; however in the *ca14*  
227 morphants that elevation was severely curtailed (**Fig 5E-G**). Therefore CA14 mediated melanocyte  
228 maturation by altering the pigmentation gene expression. We then went ahead to elucidate the mechanism  
229 of CA14 mediated pigmentation using cultured cells as the model system.

230

231

232 ***CA14 increases intracellular pH during pigmentation***

233 Since Ca14 is a MITF dependent gene, expression changes during pigmentation and a downstream  
234 modulation of pH due to its carbonic anhydrase activity emerged as a possibility. To study this we  
235 induced pigmentation in B16 cells using the pigmentation oscillator. On different days of the  
236 pigmentation oscillator the levels of the Ca14 mRNA and protein using q-PCR and western blot analysis  
237 respectively was quantified. CA14 expression at both protein as well as mRNA levels was high during  
238 early phase (day 4) and progressively decreased at the later days of pigmentation (**Fig 4A**,  
239 **Supplementary Fig S5**).

240 As carbonic anhydrases mediate pH buffering, we measured  $pH_i$  using the ratiometric pH  
241 sensitive dye (BCECF-AM) that reports intracellular pH ( $pH_i$ ). We observed a consistent increase in  $pH_i$   
242 from around 7.0 on day 0 to 7.9 on day 4, which is subsequently restored to around 7.0 on day 8 of the  
243 oscillator (**Fig 4B**). Strikingly, this trend followed changes in Ca14 expression. The pigmentation non-  
244 permissive condition involving 10% CO<sub>2</sub> did not demonstrate a sharp rise in  $pH_i$  on day 4. We observed a  
245 decrease in Ca14 protein levels on day 8 in both 5% and 10% conditions, suggesting that CO<sub>2</sub> mediates its  
246 effects on pH by shifting the equilibrium towards an acidic pH (**Fig 4C**). We then proceeded to  
247 unequivocally establish the role of Ca14 in altering  $pH_i$ .

248 We transfected B16 cells with C-terminal mCherry tagged CA14 to trace the transfected cells for  
249 pH measurements. There was a marginal but significant elevation of  $pH_i$  which could not be observed for  
250 the catalytically inactive mutant form (CA14<sub>T166I</sub>). Silencing *cal4* using a cocktail of four independent  
251 siRNAs caused intracellular acidification and reduced  $pH_i$  (**Fig 4D**). Together the two data confirm the  
252 role of CA14 in elevating intracellular pH. CA14 mediated elevation of  $pH_i$  in B16 cells raised the  
253 question about the localization of CA14 in melanocytes.

254

255 ***CA14 is localized to the nucleus in melanocytes***

256 CA14 is an alpha-type carbonic anhydrase domain containing type I transmembrane protein, preceded by  
257 a short signal sequence (Whittington et al, 2004). Hence the catalytic motif is predicted to function in

## pH regulates melanocyte maturation

258 buffering extracellular pH ( $\text{pH}_e$ ), alternately its localization to intracellular membranes would modulate  
259 organelle pH. Expression of Ca14 is high in adult brain, retinal pigmented epithelium, liver, heart, and  
260 skeletal muscle and its localization in various cell-types differ (Hallerdei et al, 2010; Purkerson &  
261 Schwartz, 2007; Vargas & Alvarez, 2012; Wetzel et al, 2007). While in smooth muscle cells its  
262 expression is detected in sarcoplasmic reticulum, in other cell-types expression in plasma membrane is  
263 indicated (Wetzel et al, 2007). Being a MITF inducible gene Ca14 like other targets could be localized to  
264 melanosomes, where the pH regulation is known to be critical (Ancans et al, 2001). However its control  
265 over  $\text{pH}_i$  indicates its localization to the cytoplasmic or a connected subcellular compartment.

266 Immunofluorescence studies were carried out on B16 cells to identify the localization of CA14 in  
267 melanocytes. Intracellular localization of CA14 could be detected in the nucleus of B16 cells (**Fig 4E**).  
268 Fractionation of cells to enrich the nuclear and melanosomal fractions, followed by western blot analysis  
269 confirmed CA14 localization to the nucleus and not to melanosomes (**Fig 4F**). This is strikingly similar to  
270 another transmembrane paralog CA9 that localizes to the nucleus and is involved in nucleolar gene  
271 expression (Sasso et al, 2015). CA9 has been an important target for pH modulation in several cancers  
272 including melanoma (Supuran & Winum, 2015).

273 While culturing primary human melanocytes in the laboratory we had previously observed that  
274 the cells grown under MBM-4 medium compared to M254 medium were more proliferative and had less  
275 melanin content. Similar observations were also reported earlier (Kormos et al, 2011). We observed that  
276 the expression of CA14 was higher in M254 medium and localization was primarily in the nucleus.  
277 Whereas in MBM-4 media the cells had lower expression of ca14 and the immuno-localization was found  
278 to be diffuse (**Supplementary Fig S6**). These observations further add credence to a possible role of  
279 CA14 in melanocyte maturation. To understand the mechanism we proceeded to investigate the effect of  
280 CA14 silencing on the expression of pigmentation genes in B16 cells.

281

282 *Ca14 mediates pigmentation gene expression through a transcriptional response*



## pH regulates melanocyte maturation

283 *Ca14* by virtue of being regulated by *Mitf*, its control over pH<sub>i</sub> and its role in sustaining melanin content  
284 of zebrafish melanophores makes it a likely candidate to mediate melanocytes maturation. Hence we set  
285 out to address the effect of down-regulating *cal4* on the expression of pigmentation genes. We  
286 transfected B16 cells with a pool of four siRNAs targeting *cal4* or control non-targeting siRNA pool and  
287 the cells were subjected to downstream experiments. Independently, shRNA mediated knockdown was  
288 also carried out. Western blot analysis was performed on the cell lysates and a reduction of around 60%  
289 was observed for CA14 (**Fig 5A and Supplementary Fig S3A**). Expression of pigmentation genes was  
290 found out to be lower upon Ca14 silencing in both the approaches. mRNA levels of *dct* and *Tyr* was  
291 found to be downregulated by q-RT PCR analysis (**Fig 5B**). We further confirmed that the down-  
292 regulation is at the transcriptional level by performing luciferase assays using *dct* promoter driven firefly  
293 luciferase (**Fig 5C**). The *Dct* promoter activity was marginally but consistently downregulated by around  
294 30% upon silencing of *ca14*. We observed an increase in the promoter activity of an unrelated promoter  
295 *kif1b* suggesting that the decrease is unlikely due to possible alterations in luciferase activity due to  
296 changes in pH.

297         Given the nuclear expression of CA14, it is likely that the local pH changes may culminate in  
298 specific transcriptional response. Since *Dct* and the other melanocyte differentiation genes are direct  
299 targets for MITF, it is surprising that Ca14 is able to modulate gene expression without affecting MITF  
300 levels. It is therefore likely that Ca14 could mediate transcriptional activation by facilitating chromatin  
301 alterations, which in turn facilitate MITF mediated gene expression. This possibility also allows for  
302 promoter specific alterations rendering selectivity in the downstream gene expression. In an earlier work  
303 the authors reported changes in histone acetylation upon intracellular pH change (McBrian et al, 2012) ,  
304 hence we set out to investigate this possibility.

305

### 306 *Ca14 promotes H3K27 acetylation marks on select MITF target genes*

307 Thus far we could establish that Ca14 is present in the nucleus, increases intracellular pH and enhances  
308 the expression of pigmentation genes. We went ahead and monitored global changes in histone

## pH regulates melanocyte maturation

309 acetylation using western blot analysis and observed a modest but consistent decrease across AcH3K27  
310 (Acetylated Histone 3 at Lys 27 position) and AcH2A.Z, but not in AcH3K18, AcH3K9 or AcH4K12  
311 (**Fig 5D**). This provided an exciting possibility of local pH changes culminating in epigenetic marks that  
312 would in turn affect pigmentation gene expression profiles downstream of MITF. While the trend of  
313 decrease in AcH3K27 was consistent across three independent biological replicate experiments, the effect  
314 was marginal around 30 – 40% reduction in global acetylation. We then proceeded to query the specific  
315 changes in a battery of promoters of MITF target genes using chromatin immunoprecipitation (ChIP).

316 We transfected B16 cells with control non-targeting or the CA14 targeting ShRNA construct and  
317 allowed cells to initiate pigmentation by setting up pigmentation oscillation. Cells were subjected to  
318 crosslinking on day 5, a day after the peak in pH<sub>i</sub> is observed and chromatin immunoprecipitation was  
319 carried out with acetylated H3K27 as well as control IgG. Relative enrichment with respect to the input  
320 DNA was quantitated by q-RT PCR using promoter specific primers. The enrichment of AcH3K27 was  
321 decreased at the promoters of *Tyr*, *Dct* and *Gp100* genes (**Fig 5F**). We observed that AcH3K27  
322 occupancy at Tyr promoter was reduced by around 50%, *Dct* promoter by 33% and *Gp100* by a marginal  
323 but consistent decrease of around 12%. However the promoters of other MITF targets *Tyrp1*, and *Cdk2* as  
324 well as the promoter of *Mitf* itself remained unaltered upon Ca14 silencing (**Fig 5F**). This experiment  
325 confirmed that Ca14 brings about the promoter specific changes in activation marks and provides a  
326 molecular basis of pigmentation gene expression control mediated by MITF. This data also reinforces  
327 earlier observations that the pigmentation gene targets of MITF have unusually high H3K27 acetylation  
328 profiles as compared to global average or other targets of MITF (Malcov-Brog et al, 2018).

329

### 330 *Histone Acetyl Transferase activity of p300 is elevated at an alkaline pH*

331 We then set out to identify the pH dependent mechanism of histone acetylation. p300/CBP emerged as a  
332 probable candidate as it mediates H3K27 acetylation, additionally physical interaction of MITF with  
333 p300/CBP is already established (Sato et al, 1997). In vitro activity of recombinant p300 HAT domain  
334 was carried out with a synthetic peptide of histone H3 and acetyl CoA, and the product CoA is measured

## pH regulates melanocyte maturation

335 by coupling with a fluorophore. Activity at around the neutral pH 7.15 was 1/8<sup>th</sup> of its activity at pH 7.95;  
336 thereby suggesting that acetylation by p300 would be clearly high at alkaline pH (**Fig 5G**). Hence this  
337 study provided a possible effector of the pH<sub>i</sub> that could control pigmentation gene expression.

338 To confirm the involvement of p300/CBP in pigmentation, we incubated the B16 cells with C646  
339 a selective inhibitor of the p300/CBP HAT activity. Upon inhibition, B16 cells despite being subjected to  
340 pigmentation permissive 5% CO<sub>2</sub> condition did not pigment (**Fig 5H**). The expression of melanocyte  
341 differentiation genes was downregulated with marginal changes in MITF transcript levels, confirming that  
342 p300/CBP facilitate the melanocyte maturation process by enhancing the expression of differentiation  
343 genes. Taken together, we demonstrate that MITF activates Ca14 transcriptionally; Ca14 increases pH<sub>i</sub>  
344 that in turn can activate p300 HAT activity, which acetylates histone H3 in the promoters of melanocyte  
345 differentiation genes facilitating their transcriptional activation by MITF (**Fig 5I**). Hence this feed  
346 forward loop enables quick and heightened expression of differentiation genes under conditions where the  
347 cells require rapid pigmentation.

348

### 349 *Targeted mutation of ca14 reiterates the role of feed forward loop on pigmentation*

350 We chose to address the role of this feed forward loop mediated by CA14 in pigmentation under  
351 physiological conditions wherein rapid and programmed induction of pigmentation genes is involved. We  
352 created a germline mutant in zebrafish by targeting the ca14 coding region using the CRISPR-Cas9  
353 system. We injected Cas9 - guide RNA complex to fertilized zebrafish embryos at the single cell stage.  
354 We observed a variety of phenotypes in F0, which include microcephaly, small eye size, mild  
355 enlargement of heart and decreased pigmentation. These phenotypes recapitulate the known high  
356 expression of Ca14 in brain, heart and eye. After screening for mutants using T7 endonuclease assay,  
357 siblings were grown to adulthood. Genotyping revealed a frame-shift mutation at the third codon by the  
358 deletion of two bases. Thereby the mutant gene would encode a truncated protein lacking most the coding  
359 amino acids (**Supplementary Fig S8**). Further experiments were carried out using F2 embryos obtained  
360 from the in-cross of a homozygous mutant male and a heterozygous female fish with the same mutation.

## pH regulates melanocyte maturation

361 We obtained around 50% of embryos with a smaller eye size and decreased pigmentation, following a  
362 Mendelian pattern of inheritance. Mutant embryos showed the two base deletion and the non-phenotypic  
363 siblings were heterozygous based on PCR confirmation of the mutation. Thereby the pigmentation  
364 phenotype observed in the morphant embryos is recapitulated in the genetic mutants, hence ascertaining  
365 the regulatory role of Ca14 in the maturation of melanocytes (**Fig 6A**).

366 In the adult stage Ca14 mutation had a visible decrease in pigmentation, however high  
367 melanophore density present in the lateral and dorsal region precluded assessment of melanin. We  
368 therefore subjected the wild type adult and the *cal4<sup>fs003-/-</sup>* fishes to dark adaptation to disperse the existing  
369 melanin within the melanocyte so that the content could be easily assessed. We observed distinct non-  
370 overlapping melanophores present in fourth and fifth stripes near the caudal fin and in this region a  
371 substantial reduction in the melanin content could be observed in the mutant fish (**Fig 6B & C**).

372 We chose 36 hpf time point to analyze the expression of differentiation genes when the pigment  
373 cells undergo migration and maturation. A decreased gene expression of *tyr*, *tyrp1b* and *dct* could be  
374 observed in the mutant embryos (**Fig 6D**); confirming that the cells are in an immature less pigmented  
375 state and the pigmentation promoting gene expression is severely reduced in the absence of Ca14.

376

### 377 *Ca14 mutant melanophores are acidic with reduced pigmentation*

378 We then subjected the wild type and the *cal4<sup>fs003-/-</sup>* to intracellular pH measurements. Mutant  
379 embryos had lower ratiometric values of BCECF (490/440) suggesting an acidic intracellular pH in  
380 melanocytes (**Fig 6E**). We also attempted a chemical rescue approach by subjecting the mutant embryos  
381 to embryo water buffered at various pH between 24 hpf to 36 hpf, when the melanocyte maturation  
382 commences. While the acidic pH 5 did not show a rescue rather showed a marginal increase in  
383 deformities, alkaline pH 10 rescued the phenotype marginally and animals with small eye had now  
384 substantially high melanin content (**Fig 6F**). The extent of pH-mediated rescue was comparable when the  
385 animals were injected with mouse Ca14 mRNA. It is interesting to note that; in the *cal4<sup>fs003-/-</sup>* mutant  
386 number of melanocytes remains unaltered but the expression of differentiation effectors is relatively low.

## pH regulates melanocyte maturation

387 Therefore in the absence of ca14, melanocytes would still respond to external cues and activate Mitf,  
388 however the extent of pigmentation would be severely curtailed. The mutant melanophores clearly  
389 showed decreased melanin content, thereby unequivocally establishing the role of the feed forward loop  
390 involving MITF, Ca14 and the differentiation genes in ensuring a heightened pigmentation.

391 **Discussion**

392 Several genes that alter melanin content and melanocyte functions are easily identified using naturally  
393 occurring mutants and targeted gene disruptions (Bennett & Lamoreux, 2003). Recently, siRNA based  
394 genome-wide screen revealed some of the important pigmentation genes (Ganesan et al, 2008). While  
395 these perturbation-based approaches reveal the identity of components, biologically relevant regulators  
396 and the physiological context are often the most difficult to decipher. In our earlier work, *cal4* gene was  
397 observed to co-regulate with the pigmentation status in B16 melanoma cells (Natarajan et al, 2014).  
398 Taking clue from this observation and the indication that *cal4* could be under the control of Mitf, we  
399 have embarked on identifying the role of CA14 in melanocyte functions. In the current study, using cell  
400 as well as whole animal based approach using zebrafish, we demonstrate an important role for CA14 and  
401 the downstream pH changes as an amplifier of the maturation process in melanocytes.

402 As a general theme pH changes and cell fate decisions have attracted a lot of attention, but  
403 precise mechanistic understanding is often limited by the widespread changes brought about by pH  
404 (Tatapudy et al, 2017). CA14 was identified as a potential Mitf target gene based on promoter binding  
405 and up-regulation of mRNA in melanocytes overexpressing Mitf (Hoek et al, 2008; Strub et al, 2011).  
406 However the physiological implications of this observation was not readily apparent. Based on our study,  
407 we propose a model wherein CA14 is an early gene induced by Mitf, and together the two accelerate the  
408 gene expression of a subset of pigmentation genes resulting in a feed-forward amplification. This mode of  
409 network interaction is seen often during cell differentiation programs. For instance, during chondrogenic  
410 differentiation two key transcription factors Bmp2 and Shh, operate to regulate Sox9 in a positive  
411 feedback loop to stimulate cellular differentiation (Zeng et al, 2002).

412 While the link between pH and cell differentiation is often observed across many systems,  
413 mechanisms that could connect changes in pH to pigmentation gene expression were not immediately  
414 apparent. An increase in intracellular pH ( $pH_i$ ) is necessary for the differentiation of follicle stem cells in  
415 drosophila (FSCs) as well as mouse embryonic stem cells (mESCs) (Ulmschneider et al, 2016).  
416 *Drosophila*  $Na^+-H^+$  exchanger *DNhe2* is involved in lowering the  $pH_i$  in differentiating cells and impairs

## pH regulates melanocyte maturation

417 prefollicular cell differentiation, whereas increasing  $pH_i$  promotes excess differentiation toward a  
418 polar/stalk cell fate through the suppression of Hedgehog pathway. Together with our observations, it is  
419 now apparent that this metabolic link involving pH and cell differentiation may be a far more widespread  
420 mechanism that would be operational in many cell types. Earlier studies indicate that *Mitf* regulates  
421 differentiation of precursors to mature osteoclasts by the induction of carbonic anhydrase II, which is  
422 responsible for extracellular acidification (Lehenkari et al, 1998; Lu et al, 2010). It is likely that pH-  
423 mediated induction of differentiation and its regulation by *Mitf* may be an underlying theme conserved  
424 across several cell types.

425         The role of p300/CBP in MITF mediated gene expression has emerged from multiple evidences.  
426 Activated MITF physically interacts with p300/CBP, and *Mitf* immunoprecipitate has associated HAT  
427 acitivity (Price et al, 1998) (Sato et al, 1997). However the physiological effect of this association  
428 remained enigmatic, as MITF mutants defective in binding to p300/CBP still activated transcription  
429 (Vachtenheim et al, 2007). The footprint of a SWI/SNF complex involving BRG1 on MITF targets has  
430 distinct clusters of genes with high as well as low H3K27 acetylation status (Laurette et al, 2015).  
431 Thereby it is likely that distinct subsets of MITF targets have different levels of activation. This is also  
432 recently alluded to by (Malcov-Brog et al, 2018). The authors demonstrate that H3K27 acetylation pattern  
433 is unusually high in pigmentation related MITF targets compared to proliferation and sustenance genes.  
434 Hence making dynamic regulation of H3K27 acetylation a prerequisite for a subset of genes, while others  
435 are less dependent on this activation. The identification of Ca14 mediated p300 activation elucidated in  
436 this study provides a plausible mechanism for this crucial but so far intriguing observation on the context  
437 dependent target selectivity by MITF.

438         p300 histone acetyl transferase is a central epigenetic regulator and the observed pH mediated  
439 activation is likely to be a general phenomenon. The crystal structure of the p300 HAT domain revealed  
440 an unusual hit and run catalytic “Theorell-Chance” mechanism (Liu et al, 2008). Subsequent molecular  
441 dynamic simulations suggest a proton relay from the  $\epsilon$  amino group of the acceptor lysine substrate and it  
442 is predicted that the involved side chains have a high  $pK_a$  (Zhang et al, 2014). The standard enzymatic

## pH regulates melanocyte maturation

443 assays involving p300 are routinely carried out at an alkaline pH 7.8 - 8.0 which would favour  
444 deprotonation providing a molecular mechanism of pH-mediated HAT activation. Thereby the transient  
445 increase in pH mediated by Ca14 facilitates H3K27 acetylation by p300 thereby rendering activation of  
446 these genes.

447 Ca14 mediated feed-forward loop would be operational under conditions wherein rapid  
448 melanocyte maturation is required. This is anticipated during UV induced sun tanning response as well as  
449 developmental states wherein melanocytes mature into a high melanin containing cells. Recent study  
450 identified *ca14* to be downregulated in the lesional depigmented skin of vitiligo subjects (Yu et al, 2012).  
451 It is tempting to speculate that the depigmentation in vitiligo could be contributed by the decrease in  
452 CA14 that could affect melanocyte maturation, in addition to the loss of mature melanocytes. Advances  
453 made in this study are therefore of immense relevance in the recently emerging role of biochemical milieu  
454 as an intermediate effector in determining the cell fate decisions.

455

### 456 **Materials and Methods**

#### 457 *Cell line and culture*

458 B16 mouse melanoma cell line was cultured in DMEM-high glucose (Gibco, Life Technologies) medium  
459 supplemented with 10% fetal bovine serum (FBS; Gibco, Life Technologies) and cells were maintained in  
460 5% (or at 10% CO<sub>2</sub> when indicated) in a 37<sup>0</sup>C incubator. The orthologous non-cancerous murine  
461 melanocyte line Melan-A was cultured at 10% CO<sub>2</sub> at 37<sup>0</sup> C in RPMI-1640 medium (Gibco, Life  
462 Technologies) supplemented with 10% fetal bovine serum (FBS; Gibco, Life Technologies), 400nM  
463 Phorbol-Myristyl-13-acetate (PMA; Sigma) and 0.003% Phenylthiourea (PTU, Sigma). Primary human  
464 melanocytes were grown in proliferative conditions in PMA containing medium MBM4 (Lonza). For  
465 differentiation cells were switched to M254 medium for 3-4 population doublings (ThermoFisher  
466 Scientific, Life Technologies).

467

#### 468 *Setup of pigmentation oscillation model in B16 cells*



## pH regulates melanocyte maturation

469 Detailed Protocol described in (Natarajan et al, 2014). Briefly, B16 cells were seeded at density of 100  
470 cells/cm<sup>2</sup> in DMEM-high glucose medium supplemented with 10% FBS. Cells were cultured at 5% CO<sub>2</sub>  
471 and were harvested at day 4, 6, and 8 for downstream experiments. The cells progressively pigmented and  
472 the expression of pigmentation genes were induced in this model system (**Supplementary Fig S2**). To  
473 modulate the pH cells were alternatively cultured in 10% CO<sub>2</sub> and subsequent changes in pH, melanin  
474 content and gene expression were investigated. P300/CBP inhibitor C646 or vehicle control DMSO  
475 treatment was performed at Day 1 of pigmentation oscillator and terminated on Day 6 for downstream  
476 analysis.

477

### 478 *Generation of ca14 promoter construct, Ca14 expression construct and the inactive mutant*

479 The *ca14* 3kb promoter (3000 bp upstream of transcription start site) was amplified from mouse genomic  
480 DNA and cloned upstream of luciferase cassette in KpnI/HindIII site of pGL4.23 (Promega) using  
481 primers listed in **Supplementary table 1**. Mouse Ca14 coding sequence was amplified from mouse B16  
482 cDNA and cloned in mcherryN1 vector (Clontech) in KpnI/HindIII site. Site directed mutagenesis for  
483 CA14 (Thr199Ile) was carried out using SDM II kit (Agilent) using primers listed in **Supplementary**  
484 **table 1**. Truncated constructs of 1kb (proximal, middle, distal from TSS) were generated from *Ca14* 3kb  
485 promoter. *Dct* promoter used in this study is reported elsewhere (Natarajan et al, 2014).

486

### 487 *Measurement of intracellular pH*

488 *For mammalian cells:* Intracellular pH (pH<sub>i</sub>) was measured by using the ratiometric dye BCECF-AM  
489 (Molecular probes, Thermo scientific), as described in (Natarajan et al, 2014). Briefly cells were plated in  
490 35 mm dishes (IBIDI) and on the day of pH measurement cells were incubated with 0.2μM of BCECF-  
491 AM dye for 2min at 37<sup>0</sup>C and 5% CO<sub>2</sub>. In order to generate a pH calibration curve, cells were incubated  
492 in pH calibration solution (in mM:1Glucose, 140KCl, 1MgSO<sub>4</sub>, 30HEPES, 25NaCl, 1CaCl<sub>2</sub>,  
493 1NaH<sub>2</sub>PO<sub>4</sub>)with pH range of 6– 8.5 and added 10μMNigericin (Thermofisher Scientific). Quantitative

## pH regulates melanocyte maturation

494 images were acquired and fluorescence ratio was measured at dual excitation wavelength of 440 and 490  
495 nm in Leica SP8 confocal microscope.

496 *For zebrafish embryos:* 2 dpf zebrafish embryos were taken and dechorinated. 10 embryos were  
497 incubated with 10mM BCECF-AM (Thermofisher scientific) in embryo water at 28C incubator for 15  
498 minutes. After incubation the embryos were washed, embedded in methylcellulose and taken for  
499 quantitative imaging using Leica SP8 confocal microscope.

500

### 501 *Plasmid and silencing RNA Transfections*

502 B16 cells were trypsinized and seeded at density of  $1 \times 10^5$  cells/well in 6 well plate (BD Bioscience) and  
503 incubated overnight in antibiotic containing DMEM + 10% FBS. At the time of transfection, the cells  
504 were replaced with serum and antibiotic free media OptiMEM (Gibco, Life Technologies). Lipofectamine  
505 2000 was used at a ratio of 1:2 with CA14 siRNA or the scrambled control siRNA (Dharmacon). The  
506 cells were incubated for 6 hours with the transfection mixture containing Lipofectamine 2000, OptiMEM  
507 and the siRNA. The media was then replaced with antibiotic containing DMEM+10% FBS and incubated  
508 for 72 hours and downstream experiments were performed.

509 NHEM cells were trypsinized and seeded at density of  $1 \times 10^5$  cells/well in 6-well plate (BD  
510 Bioscience) and incubated overnight with antibiotic containing M254 (Thermofisher Scientific). Next day  
511 cells were washed with DPBS (Gibco, Life Technologies) and were replaced with antibiotic free  
512 OptiMEM media (Gibco, Life Technologies). Cellfectin (Invitrogen) was used at a ratio of 1:2 with MITF  
513 siRNA and CA14 siRNA (Dharmacon) and incubated for 6 hours. The transfection mixture was replaced  
514 with antibiotic containing M254 media and incubated for 72 hours.

515

### 516 *Treatment for the induction of MITF:*

517 Melan-a cells were trypsinized and seeded at density of  $1 \times 10^5$  cells/well in 6 well plate (BD Bioscience)  
518 and incubated overnight with antibiotic containing RPMI 1640+10% FBS. Next day fresh media was  
519 added to the cells and treatment was performed with  $\alpha$ -MSH (1000nM; Sigma) and IBMX (60uM; Sigma).

## pH regulates melanocyte maturation

520 The cells were incubated at 37<sup>0</sup> C at 10% CO<sub>2</sub> and were then harvested for protein isolation after 48 and  
521 72 hours.

### 522 *RNA Isolation & cDNA synthesis*

523 Cells were trypsinised with 0.1% trypsin and the pellet was washed twice with 1X Phosphate Buffered  
524 Saline (PBS; Gibco Life Technologies). To the pelleted cells 1ml of TriZol (Ambion, Invitrogen) was  
525 added and stored at -80<sup>0</sup> C overnight. The RNA was isolated using standard Trizol based method. The  
526 isolated RNA was subjected to DNase (Qiagen) treatment for 20 minutes at room temperature. Column  
527 purification of the RNA was performed using RNAeasy mini kit (Qiagen, Cat 74104) according to  
528 manufacturer's protocol. 100-500 ng of RNA was taken for cDNA synthesis using Superscript III  
529 (Invitrogen, Life Technologies) according to manufacturer's protocol. Q-RT pcr experiments were  
530 performed either by SYBR green or TaqMAN assay probes (Details provided in **Supplementary table 1**)  
531 according to manufacturer's protocol using Lightcycler 480 II (Roche).

532

### 533 *Isolation of nuclear and melanosomal fractions*

534 Nuclear proteins were extracted using NE-PER<sup>TM</sup> nuclear and cytoplasmic extraction reagents  
535 (Thermoscientific; 78833) according to manufacturer's protocol. Melanosomes were isolated using  
536 protocol previously described (Watabe et al, 2005). The B16 tumor from mice was excised and washed in  
537 homogenization buffer and was homogenized with 120 strokes of dounce glass homogenizer. Post nuclear  
538 supernatant was isolated and then separated on a stepwise density gradient and centrifuged at 1,00,000 g  
539 for 1 hour at 4<sup>0</sup> C in a swing out rotor. The stage III and IV melanosomes which preferentially localized to  
540 the highest density fraction (1.8-2.0) were collected and protein was isolated using NP40 lysis buffer.

541

### 542 *Protein Isolation and Western Blot analysis*

543 Cells were trypsinised with 0.1% trypsin and the pellet was washed twice with 1X Phosphate Buffered  
544 Saline (PBS; Gibco Life Technologies). NP40 lysis buffer (Invitrogen) was added to the pellet and was  
545 incubated on ice for 30 minutes with pipetting at interval of 10 minutes. The cells were centrifuged down

## pH regulates melanocyte maturation

546 at 13,000 rpm for 30 minutes at 4<sup>0</sup>C (Eppendorf Centrifuge 5415 R). The supernatant was collected and  
547 transferred to a fresh microfuge tube. For Histone blots lamelli lysis buffer was used. The protein was  
548 estimated using standard BCA protocol (Pierce BCA protein assay kit; ThermoScientific). Equal amount  
549 of protein from each sample were resolved in 10 or 12% % SDS gel in 1X Tris glycine buffer. The gel  
550 was blotted onto 0.45 uM PVDF membrane (Millipore) at 300mA for 2 hours. 5% Skim milk was used  
551 for blocking for 1 hour at room temperature. Incubation with primary antibody was performed for  
552 overnight at 4<sup>0</sup> C. Primary antibody dilutions are provided in **Supplementary table 1**. After washing the  
553 blot with 1X TBST, the blot was incubated with HRP conjugated secondary antibody for 1 hour at room  
554 temperature. After washing with 1X TBST the blot was developed using Immobilon Western (Millipore)  
555 in the Syngene GBOX Chemiluminescence instrument. Densitometry analysis was performed using  
556 ImageJ software.

557

### 558 *Chromatin Immunoprecipitation and q-RT PCR*

559 B16 Melanoma cells at 80% confluence was fixed with 10% formalin (Sigma Cat No HT501128) and  
560 incubated at 37 C for 10 minutes. 2.5 M Glycine was added to the cells and again incubated at 37 C for 10  
561 minutes. Cells were washed with Ice cold 1X PBS containing protease inhibitors. Cells were then scraped  
562 and centrifuged at 1000 rpm for 5 minutes at 4C. The cell pellet was lysed in SDS lysis buffer (1% SDS,  
563 10mM EDTA, 50mM TRIS (pH 8.1)) on ice for 30 minutes. The cells were then sonicated on bioruptor  
564 (DIAGENODE) in ice. The chromatin lysate was then estimated for protein content using BCA kit  
565 (Pierce). 5ug of MITF C5 antibody (Abcam) was taken and incubated with Protein G Dynabeads  
566 (ThermoScientific) overnight at 4 C on a rotator. 3ug of acetylated H3K27 antibody was incubated with  
567 Protein A dynabeads (ThermoScientific) overnight at 4 C on a rotator. The next day the sera was cleared  
568 and washed with Ice cold dilution buffer (2mM EDTA, 150mM NaCl, 20mM Tris HCl (pH 8)). 500 ug of  
569 chromatin lysate was added to the beads and the final volume was made up to 750ul using the dilution  
570 buffer and incubated for 6 hrs at 4C in a rotator. 10% of the lysate was kept separately as input. After  
571 incubation the magnetic beads were washed with Low salt Buffer (0.1 % SDS, 1% Triton X 100, 2mM

## pH regulates melanocyte maturation

572 EDTA, 20mM Tris HCl (pH 8), 150mM NaCl), high salt buffer (0.1 % SDS, 1% Triton X 100, 2mM  
573 EDTA, 20mM Tris HCl (pH 8), 500mM NaCl) and LiCl buffer (0.25 M LiCl, 1% Igepal C-630, 1mM  
574 EDTA, 10mM Tris HCl (pH 8), 1% deoxycholate). Finally the magnetic beads were incubated overnight  
575 at 65 C in elution buffer (1% SDS, 0.75% sodium bicarbonate) and 1ul of 20mg/ml proteinase K (Sigma)  
576 for elution and subsequent reverse crosslinking. The magnetic beads were separated from supernatant and  
577 column purified using QIAgen pcr purification kit, the input control was also included in the purification  
578 step. SYBR qRT PCR was setup using 5ul of eluted DNA and graphs were plotted as percentage input.

579

### 580 *Immunofluorescence*

581 The cells plated on coverslips were washed twice with 1X PBS and then fixed with 4% PFA at 37<sup>0</sup>C for  
582 20 minutes. The cells were again washed twice with 1X PBS and permeabilized with 0.01 % Triton X100  
583 (Sigma). The cells were blocked with 5% Normal goat serum (Jackson Laboratories) overnight at 4<sup>0</sup>C.  
584 The cells were washed twice with PBST (1X PBS with 0.01% Tween-20). The cells were then incubated  
585 with 1:50 dilution of CA14 antibody (Abcam) in a moist chamber for 1 h at room temperature. Incubation  
586 with secondary antibody (Alexafluor488; Molecular probes, ThermoScientific) was performed at room  
587 temperature for 1 h. The cells were again washed with PBST. The cells were then mounted on slides  
588 using Antifade slowfade DAPI (Molecular probes, Invitrogen) and visualized using Confocal Microscope  
589 (Zeiss LSM 510 or Leica SP8).

590

### 591 *P300 HAT activity assay*

592 HAT activity assay was performed using KAT3B/P300 inhibitor fluorometric assay screening kit (Abcam,  
593 ab196996) according to manufacturers protocol with minor modification. Tris-Cl pH 7.15 and pH 7.95  
594 was added at an additional concentration of 50mM to buffer provided in the kit and the assays were  
595 performed with the modified buffers.

596

### 597 *Zebrafish Ethics Statement*

## pH regulates melanocyte maturation

598 Fish experiments were performed in strict accordance with the recommendations and guidelines laid  
599 down by the CSIR Institute of Genomics and Integrative Biology, India. The protocol was approved by  
600 the Institutional Animal Ethics Committee (IAEC) of the CSIR Institute of Genomics and Integrative  
601 Biology, India (Proposal No 45a). All efforts were made to minimize animal suffering.

### 602 *Zebrafish strains and maintenance*

603 The wild type strain Assam WT (ASWT) and Tyrp1 reporter, *Tg(ftyrp1: GFP)* zebrafish lines were used  
604 for morpholino injections and were maintained according to standard zebrafish husbandry protocols.  
605 *ftyrp1:GFP* plasmid was a kind gift from Dr Xiangyun Wei (Zou et al, 2006), University of Pittsburgh  
606 School of Medicine and the transgenic line was created at CSIR-IGIB zebrafish facility using tol2  
607 transposase microinjections in ASWT line. Phenylthiourea (PTU; 0.003%) was added to embryo water  
608 before 24 hours post fertilization (hpf) to prevent melanin from masking the GFP fluorescence. For pH  
609 rescue experiments the embryos were grown in embryo media buffered with 10mM HEPES.

610

### 611 *Morpholino knockdown of zebrafish Ca14:*

612 Antisense morpholino was synthesized from Gene Tools against Ca14 of zebrafish. The morpholino was  
613 designed to block the translation of *car14* gene. Morpholino sequence with translation initiation site  
614 (initiator ATG codon) is underlined CCATGATTTCACTATTCTCCCTACA. Standard control was  
615 obtained from Genetools and injected at same dosage as *ca14* morpholino.

616

### 617 *ca14 CRISPR mutant generation*

618 Zebrafish *ca14* CRISPR was designed using ECRISP software (<http://www.e-crisp.org/E-CRISP/>). The  
619 CRISPR sgRNA sequence was in vitro transcribed using mMessage mMachine T7 ULTRA kit  
620 (ThermoFisher scientific). 300 pg of sgRNA was injected along with 500 pg of *spcas9* protein (kind gift  
621 from Dr Souvik Maiti, CSIR-IGIB). The F0 embryos were screened using T7 endonuclease assay for

## pH regulates melanocyte maturation

622 mutations and the putative mutant siblings were grown to adulthood and inbred to get F1 animals.

623 Mutations in the F1 fishes were confirmed using sanger sequencing.

624 The cross involving the ca14fs003 reported herein involves a  $ca14^{fs003}/-$  male with a  $ca14^{fs003}/+$   
625 female that accounts for 50% of the embryos to be phenotypic. The genotypes of the phenotypic embryos  
626 and normally pigmented embryos arising from this cross were ascertained to be  $ca14^{fs003}/-$  and  
627  $ca14^{fs003}/+$  respectively using PCR based amplification.

628

### 629 *Zebrafish imaging*

630 The embryos were manually dechorinated and embedded in 2% methylcellulose. Control and Morphant  
631 embryos were imaged laterally and dorsally for melanophore quantitation. Brightfield Images were taken  
632 using Zeiss Stemi 2000-C microscope; for fluorescence microscopy Zeiss Axioscope A1 was used.

633

### 634 *RNA Isolation from embryos*

635 Total RNA was extracted from zebrafish embryos using TriZol (Invitrogen). cDNA was synthesized  
636 using Superscript III kit (Invitrogen). Real time quantitative PCR was performed using SYBR Green  
637 (Kapa Biosystems) or TAQMAN probes (details provided in **supplementary table 1**) and data was  
638 generated in ROCHE Lightcycler 480 II.

639

### 640 *mRNA injection in zebrafish embryos:*

641 For rescue experiments the coding sequence of mouse *Ca14* gene was cloned with kozak sequence  
642 inserted in front of translation start site (**Supplementary table 1**). The amplicon was cloned into TOPO-  
643 Zero blunt vector (Thermofischer Scientific). RNA was made using *in-vitro* transcription kit T7 Ultra  
644 mRNA synthesis kit (Ambio – Thermofischer Scientific). 10 pg of Ca14 WT or Ca14<sub>T199I</sub> RNA was  
645 injected into the cell at one cell stage Ca14<sup>fs003</sup> embryos.

646

### 647 *Estimation of Melanin content:*

## pH regulates melanocyte maturation

648 Dorsal images of Control and ca14 morphant embryos were taken at 2 dpf. The images were imported to  
649 ImageJ and mean grey values were taken for melanophores of each embryo set. Mean grey values are  
650 inverse proportional to the melanin content of the cell. Corresponding values were then plotted using  
651 Graphpad Prism.

652

653 *Statistical analysis and Graphs:*

654 Student's t test was performed to obtain statistical significance in the data. Asterisk on the error bar  
655 corresponds to \*( $P \leq 0.05$ ), \*\* ( $P \leq 0.01$ ), \*\*\* ( $P \leq 0.001$ ), \*\*\*\* ( $P \leq 0.0001$ ) and ns ( $P > 0.05$ ). Graphs  
656 were plotted using Graphpad prism.

657

658



659 **Acknowledgement**

660 This work was supported by the Council for Scientific and Industrial Research (CSIR), India through  
661 grant (TOUCH-BSC0302) and Department of Biotechnology through the grant (GAP0182). We  
662 acknowledge the infrastructural support of CSIR to the imaging facility (VISION-BSC0403).

663

664 **Conflict of interest**

665 R.S.G. is the co-founder of the board of Vyome Biosciences, a biopharmaceutical company in  
666 the area of dermatology unrelated to the work presented here. Other authors do not have any  
667 competing interests.

668

669 **Author contributions**

670 D.A.R, V.G, R.S.G and T.N.V designed experiments. D.A.R, V.G, F.S and Y.J.S, executed the  
671 experiments with cultured cells. A.S performed experiments pertaining to electron microscopy. D.A.R,  
672 S.S and T.N.V were involved in the design and execution of zebrafish experiments. D.A.R, Y.J.S, V.G  
673 along with S.S, R.S.G and T.N.V were involved in data analysis, interpretations and writing of the  
674 manuscript.

675

676

677

678

679

680

681

682

683

684 **References**

- 685 **Ancans J, Tobin DJ, Hoogduijn MJ, Smit NP, Wakamatsu K, Thody AJ (2001)**  
686 **Melanosomal pH controls rate of melanogenesis, eumelanin/phaeomelanin ratio and**  
687 **melanosome maturation in melanocytes and melanoma cells. *Exp Cell Res* 268(1): 26-**  
688 **35**
- 689  
690 **Bellono NW, Escobar IE, Lefkovith AJ, Marks MS, Oancea E (2014) An intracellular**  
691 **anion channel critical for pigmentation. *Elife* 3: e04543**
- 692  
693 **Bennett DC (1983) Differentiation in mouse melanoma cells: initial reversibility and**  
694 **an on-off stochastic model. *Cell* 34(2): 445-453**
- 695  
696 **Bennett DC, Lamoreux ML (2003) The color loci of mice--a genetic century. *Pigment***  
697 ***Cell Res* 16(4): 333-344**
- 698  
699 **Boron WF (2004) Regulation of intracellular pH. *Adv Physiol Educ* 28(1-4): 160-179**  
700
- 701 **de la Serna IL, Ohkawa Y, Higashi C, Dutta C, Osias J, Kommajosyula N, Tachibana T,**  
702 **Imbalzano AN (2006) The microphthalmia-associated transcription factor requires**  
703 **SWI/SNF enzymes to activate melanocyte-specific genes. *J Biol Chem* 281(29): 20233-**  
704 **20241**
- 705  
706 **Fujikawa-Adachi K, Nishimori I, Taguchi T, Onishi S (1999) Human carbonic**  
707 **anhydrase XIV (CA14): cDNA cloning, mRNA expression, and mapping to**  
708 **chromosome 1. *Genomics* 61(1): 74-81**
- 709  
710 **Ganesan AK, Ho H, Bodemann B, Petersen S, Aruri J, Koshy S, Richardson Z, Le LQ,**  
711 **Krasieva T, Roth MG, Farmer P, White MA (2008) Genome-wide siRNA-based**  
712 **functional genomics of pigmentation identifies novel genes and pathways that**  
713 **impact melanogenesis in human cells. *PLoS Genet* 4(12): e1000298**
- 714  
715 **Halaban R, Patton RS, Cheng E, Svedine S, Trombetta ES, Wahl ML, Ariyan S, Hebert**  
716 **DN (2002) Abnormal acidification of melanoma cells induces tyrosinase retention in**  
717 **the early secretory pathway. *J Biol Chem* 277(17): 14821-14828**
- 718  
719 **Hallerdei J, Scheibe RJ, Parkkila S, Waheed A, Sly WS, Gros G, Wetzel P, Endeward V**  
720 **(2010) T tubules and surface membranes provide equally effective pathways of**  
721 **carbonic anhydrase-facilitated lactic acid transport in skeletal muscle. *PLoS One***  
722 **5(12): e15137**
- 723  
724 **Harris ML, Erickson CA (2007) Lineage specification in neural crest cell pathfinding.**  
725 ***Dev Dyn* 236(1): 1-19**
- 726

- 727 **Hoashi T, Tamaki K, Hearing VJ** The secreted form of a melanocyte membrane-bound  
728 **glycoprotein (Pmel17/gp100) is released by ectodomain shedding. *FASEB J* 24(3):**  
729 **916-930**  
730
- 731 **Hoek KS, Schlegel NC, Eichhoff OM, Widmer DS, Praetorius C, Einarsson SO,**  
732 **Valgeirsdottir S, Bergsteinsdottir K, Schepsky A, Dummer R, Steingrimsson E (2008)**  
733 **Novel MITF targets identified using a two-step DNA microarray strategy. *Pigment Cell***  
734 ***Melanoma Res* 21(6): 665-676**  
735
- 736 **Johannessen CM, Johnson LA, Piccioni F, Townes A, Frederick DT, Donahue MK,**  
737 **Narayan R, Flaherty KT, Wargo JA, Root DE, Garraway LA (2013) A melanocyte**  
738 **lineage program confers resistance to MAP kinase pathway inhibition. *Nature***  
739 **504(7478): 138-142**  
740
- 741 **Karler R, Woodbury DM (1960) Intracellular distribution of carbonic anhydrase.**  
742 ***Biochem J* 75: 538-543**  
743
- 744 **Kaunisto K, Parkkila S, Rajaniemi H, Waheed A, Grubb J, Sly WS (2002) Carbonic**  
745 **anhydrase XIV: luminal expression suggests key role in renal acidification. *Kidney Int***  
746 **61(6): 2111-2118**  
747
- 748 **Keenen B, Qi H, Saladi SV, Yeung M, de la Serna IL (2010) Heterogeneous SWI/SNF**  
749 **chromatin remodeling complexes promote expression of microphthalmia-associated**  
750 **transcription factor target genes in melanoma. *Oncogene* 29(1): 81-92**  
751
- 752 **Kormos B, Belso N, Bebes A, Szabad G, Bacsa S, Szell M, Kemeny L, Bata-Csorgo Z**  
753 **(2011) In vitro dedifferentiation of melanocytes from adult epidermis. *PLoS One***  
754 **6(2): e17197**  
755
- 756 **Laurette P, Strub T, Koludrovic D, Keime C, Le Gras S, Seberg H, Van Otterloo E,**  
757 **Imrichova H, Siddaway R, Aerts S, Cornell RA, Mengus G, Davidson I (2015)**  
758 **Transcription factor MITF and remodeler BRG1 define chromatin organisation at**  
759 **regulatory elements in melanoma cells. *Elife* 4**  
760
- 761 **Lehenkari P, Hentunen TA, Laitala-Leinonen T, Tuukkanen J, Vaananen HK (1998)**  
762 **Carbonic anhydrase II plays a major role in osteoclast differentiation and bone**  
763 **resorption by effecting the steady state intracellular pH and Ca<sup>2+</sup>. *Exp Cell Res***  
764 **242(1): 128-137**  
765
- 766 **Levy C, Fisher DE (2011) Dual roles of lineage restricted transcription factors: the**  
767 **case of MITF in melanocytes. *Transcription* 2(1): 19-22**  
768
- 769 **Levy C, Khaled M, Fisher DE (2006) MITF: master regulator of melanocyte**  
770 **development and melanoma oncogene. *Trends Mol Med* 12(9): 406-414**  
771

- 772 **Li J, Song JS, Bell RJ, Tran TN, Haq R, Liu H, Love KT, Langer R, Anderson DG, Larue L,**  
773 **Fisher DE (2012) YY1 regulates melanocyte development and function by**  
774 **cooperating with MITF. *PLoS Genet* 8(5): e1002688**  
775
- 776 **Lindskog S (1997) Structure and mechanism of carbonic anhydrase. *Pharmacol Ther***  
777 **74(1): 1-20**  
778
- 779 **Liu X, Wang L, Zhao K, Thompson PR, Hwang Y, Marmorstein R, Cole PA (2008) The**  
780 **structural basis of protein acetylation by the p300/CBP transcriptional coactivator.**  
781 ***Nature* 451(7180): 846-850**  
782
- 783 **Lu SY, Li M, Lin YL (2010) Mitf induction by RANKL is critical for osteoclastogenesis.**  
784 ***Mol Biol Cell* 21(10): 1763-1771**  
785
- 786 **Malcov-Brog H, Alpert A, Golan T, Parikh S, Nordlinger A, Netti F, Sheinboim D, Dror I,**  
787 **Thomas L, Cosson C, Gonen P, Stanevsky Y, Brenner R, Perluk T, Frand J, Elgavish S,**  
788 **Nevo Y, Rahat D, Tabach Y, Khaled M, Shen-Orr SS, Levy C (2018) UV-Protection**  
789 **Timer Controls Linkage between Stress and Pigmentation Skin Protection Systems.**  
790 ***Mol Cell* 72(3): 444-456 e447**  
791
- 792 **McBrian MA, Behbahan IS, Ferrari R, Su T, Huang TW, Li K, Hong CS, Christofk HR,**  
793 **Vogelauer M, Seligson DB, Kurdistani SK (2012) Histone acetylation regulates**  
794 **intracellular pH. *Mol Cell* 49(2): 310-321**  
795
- 796 **Mort RL, Jackson IJ, Patton EE (2015) The melanocyte lineage in development and**  
797 **disease. *Development* 142(7): 1387**  
798
- 799 **Motiani RK, Tanwar J, Raja DA, Vashisht A, Khanna S, Sharma S, Srivastava S,**  
800 **Sivasubbu S, Natarajan VT, Gokhale RS (2018) STIM1 activation of adenylyl cyclase 6**  
801 **connects Ca(2+) and cAMP signaling during melanogenesis. *EMBO J* 37(5)**  
802
- 803 **Natarajan VT, Ganju P, Singh A, Vijayan V, Kirty K, Yadav S, Puntambekar S, Bajaj S,**  
804 **Dani PP, Kar HK, Gadgil CJ, Natarajan K, Rani R, Gokhale RS (2014) IFN-gamma**  
805 **signaling maintains skin pigmentation homeostasis through regulation of**  
806 **melanosome maturation. *Proc Natl Acad Sci U S A* 111(6): 2301-2306**  
807
- 808 **Ogilvie JM, Ohlemiller KK, Shah GN, Ulmasov B, Becker TA, Waheed A, Hennig AK,**  
809 **Lukasiewicz PD, Sly WS (2007) Carbonic anhydrase XIV deficiency produces a**  
810 **functional defect in the retinal light response. *Proc Natl Acad Sci U S A* 104(20): 8514-**  
811 **8519**  
812
- 813 **Praetorius C, Grill C, Stacey SN, Metcalf AM, Gorkin DU, Robinson KC, Van Otterloo E,**  
814 **Kim RS, Bergsteinsdottir K, Ogmundsdottir MH, Magnusdottir E, Mishra PJ, Davis SR,**  
815 **Guo T, Zaidi MR, Helgason AS, Sigurdsson MI, Meltzer PS, Merlino G, Petit V, Larue L,**  
816 **Loftus SK, Adams DR, Sobhiafshar U, Emre NC, Pavan WJ, Cornell R, Smith AG,**  
817 **McCallion AS, Fisher DE, Stefansson K, Sturm RA, Steingrimsson E (2013) A**

- 818 **polymorphism in IRF4 affects human pigmentation through a tyrosinase-dependent**  
819 **MITF/TFAP2A pathway. *Cell* 155(5): 1022-1033**  
820
- 821 **Price ER, Ding HF, Badalian T, Bhattacharya S, Takemoto C, Yao TP, Hemesath TJ,**  
822 **Fisher DE (1998) Lineage-specific signaling in melanocytes. C-kit stimulation**  
823 **recruits p300/CBP to microphthalmia. *J Biol Chem* 273(29): 17983-17986**  
824
- 825 **Purkerson JM, Schwartz GJ (2007) The role of carbonic anhydrases in renal**  
826 **physiology. *Kidney Int* 71(2): 103-115**  
827
- 828 **Reibring CG, El Shahawy M, Hallberg K, Kannius-Janson M, Nilsson J, Parkkila S, Sly**  
829 **WS, Waheed A, Linde A, Gritli-Linde A (2014) Expression patterns and subcellular**  
830 **localization of carbonic anhydrases are developmentally regulated during tooth**  
831 **formation. *PLoS One* 9(5): e96007**  
832
- 833 **Sasso E, Vitale M, Monteleone F, Boffo FL, Santoriello M, Sarnataro D, Garbi C,**  
834 **Sabatella M, Crifo B, Paoletta LA, Minopoli G, Winum JY, Zambrano N (2015) Binding**  
835 **of carbonic anhydrase IX to 45S rDNA genes is prevented by exportin-1 in hypoxic**  
836 **cells. *Biomed Res Int* 2015: 674920**  
837
- 838 **Sato S, Roberts K, Gambino G, Cook A, Kouzarides T, Goding CR (1997) CBP/p300 as a**  
839 **co-factor for the Microphthalmia transcription factor. *Oncogene* 14(25): 3083-3092**  
840
- 841 **Shah GN, Ulmasov B, Waheed A, Becker T, Makani S, Svichar N, Chesler M, Sly WS**  
842 **(2005) Carbonic anhydrase IV and XIV knockout mice: roles of the respective**  
843 **carbonic anhydrases in buffering the extracellular space in brain. *Proc Natl Acad Sci***  
844 **USA 102(46): 16771-16776**  
845
- 846 **Simons M, Gault WJ, Gotthardt D, Rohatgi R, Klein TJ, Shao Y, Lee HJ, Wu AL, Fang Y,**  
847 **Satlin LM, Dow JT, Chen J, Zheng J, Boutros M, Mlodzik M (2009) Electrochemical cues**  
848 **regulate assembly of the Frizzled/Dishevelled complex at the plasma membrane**  
849 **during planar epithelial polarization. *Nat Cell Biol* 11(3): 286-294**  
850
- 851 **Strub T, Giuliano S, Ye T, Bonet C, Keime C, Kobi D, Le Gras S, Cormont M, Ballotti R,**  
852 **Bertolotto C, Davidson I (2011) Essential role of microphthalmia transcription factor**  
853 **for DNA replication, mitosis and genomic stability in melanoma. *Oncogene* 30(20):**  
854 **2319-2332**  
855
- 856 **Supuran CT, Winum JY (2015) Carbonic anhydrase IX inhibitors in cancer therapy:**  
857 **an update. *Future Med Chem* 7(11): 1407-1414**  
858
- 859 **Tatapudy S, Aloisio F, Barber D, Nystul T (2017) Cell fate decisions: emerging roles**  
860 **for metabolic signals and cell morphology. *EMBO Rep* 18(12): 2105-2118**  
861

- 862 **Ulmschneider B, Grillo-Hill BK, Benitez M, Azimova DR, Barber DL, Nystul TG (2016)**  
863 **Increased intracellular pH is necessary for adult epithelial and embryonic stem cell**  
864 **differentiation. *J Cell Biol* 215(3): 345-355**  
865
- 866 **Vachtenheim J, Sestakova B, Tuhackova Z (2007) Inhibition of MITF transcriptional**  
867 **activity independent of targeting p300/CBP coactivators. *Pigment Cell Res* 20(1): 41-**  
868 **51**  
869
- 870 **Vargas LA, Alvarez BV (2012) Carbonic anhydrase XIV in the normal and**  
871 **hypertrophic myocardium. *J Mol Cell Cardiol* 52(3): 741-752**  
872
- 873 **Wakamatsu K, Nagao A, Watanabe M, Nakao K, Ito S (2017) Pheomelanogenesis is**  
874 **promoted at a weakly acidic pH. *Pigment Cell Melanoma Res* 30(3): 372-377**  
875
- 876 **Watabe H, Kushimoto T, Valencia JC, Hearing VJ (2005) Isolation of melanosomes.**  
877 ***Curr Protoc Cell Biol* Chapter 3: Unit 3 14**  
878
- 879 **Watabe H, Valencia JC, Yasumoto K, Kushimoto T, Ando H, Muller J, Vieira WD,**  
880 **Mizoguchi M, Appella E, Hearing VJ (2004) Regulation of tyrosinase processing and**  
881 **trafficking by organellar pH and by proteasome activity. *J Biol Chem* 279(9): 7971-**  
882 **7981**  
883
- 884 **Wetzel P, Scheibe RJ, Hellmann B, Hallerdei J, Shah GN, Waheed A, Gros G, Sly WS**  
885 **(2007) Carbonic anhydrase XIV in skeletal muscle: subcellular localization and**  
886 **function from wild-type and knockout mice. *Am J Physiol Cell Physiol* 293(1): C358-**  
887 **366**  
888
- 889 **Whittington DA, Grubb JH, Waheed A, Shah GN, Sly WS, Christianson DW (2004)**  
890 **Expression, assay, and structure of the extracellular domain of murine carbonic**  
891 **anhydrase XIV: implications for selective inhibition of membrane-associated**  
892 **isozymes. *J Biol Chem* 279(8): 7223-7228**  
893
- 894 **Yu R, Broady R, Huang Y, Wang Y, Yu J, Gao M, Levings M, Wei S, Zhang S, Xu A, Su M,**  
895 **Dutz J, Zhang X, Zhou Y (2012) Transcriptome analysis reveals markers of aberrantly**  
896 **activated innate immunity in vitiligo lesional and non-lesional skin. *PLoS One* 7(12):**  
897 **e51040**  
898
- 899 **Zeng L, Kempf H, Murtaugh LC, Sato ME, Lassar AB (2002) Shh establishes an**  
900 **Nkx3.2/Sox9 autoregulatory loop that is maintained by BMP signals to induce**  
901 **somitic chondrogenesis. *Genes Dev* 16(15): 1990-2005**  
902
- 903 **Zhang X, Ouyang S, Kong X, Liang Z, Lu J, Zhu K, Zhao D, Zheng M, Jiang H, Liu X,**  
904 **Marmorstein R, Luo C (2014) Catalytic mechanism of histone acetyltransferase p300:**  
905 **from the proton transfer to acetylation reaction. *J Phys Chem B* 118(8): 2009-2019**  
906

907 **Zou J, Beermann F, Wang J, Kawakami K, Wei X (2006) The Fugu *tyrp1* promoter**  
908 **directs specific GFP expression in zebrafish: tools to study the RPE and the neural**  
909 **crest-derived melanophores. *Pigment Cell Res* 19(6): 615-627**  
910  
911  
912



913 **Figure Legends**

914 **Fig 1: Modulation of intracellular pH by CO<sub>2</sub> results in predictable changes in pigmentation via a**  
915 **transcriptional change**

916 A. B16 cells were maintained at 5 or 10% CO<sub>2</sub> for indicated days and intracellular pH (pH<sub>i</sub>) was  
917 measured by ratiometric imaging using BCECF-AM for the respective conditions. While the day  
918 4 and day 8 of 10% CO<sub>2</sub> grown cells remained close to 7.0, in 5% condition the pH<sub>i</sub> on day 4 was  
919 high by almost one pH unit. Data is obtained from three biological replicates with around 60 cells  
920 each.

921 B. Pellets of B16 cells at various days under 5 or 10% CO<sub>2</sub> culture conditions. While the initial day 4  
922 pellets look comparable, but on day 8, 5% CO<sub>2</sub> grown cells accumulate melanin, while the 10%  
923 CO<sub>2</sub> grown cells remain depigmented.

924 C. Transmission electron micrograph images of day 8 cells indicate that the 5% CO<sub>2</sub> grown cells  
925 have many darkly stained melanosomes, whereas the 10% CO<sub>2</sub> grown cells are devoid of these  
926 pigmented structures.

927 D. Top panel shows *in-gel* tyrosinase activity developed using L-DOPA as the substrate and below is  
928 part of the gel stained using coomassie brilliant blue. (bottom panel) Western blot analysis of Tyr,  
929 Gp100, Dct, Mitf and Ca14 proteins normalized to tubulin. Numbers represent tubulin normalized  
930 fold changes corresponding to day 4 cells grown at 5% CO<sub>2</sub>. 10% CO<sub>2</sub> reduces expression of  
931 pigmentation related markers without a significant decrease in Mitf.

932 E. qRT-PCR analysis of pigmentation related gene transcripts Gp100, Dct, Tyrp1 and Tyr  
933 normalized to 18s rRNA on days 4, 6 and 8 during pigmentation. The fold changes are depicted  
934 for the corresponding days for cells grown at 5% CO<sub>2</sub>. Progressive reduction in the mRNA  
935 expression of pigmentation genes is observed at the transcript level.

936

937

938



939 **Fig 2:CA14 expression is directly controlled by Mitf**

- 940 A. (top) Panel of carbonic anhydrases expressed in B16 cells along with (bottom) pigmentation  
941 genes during the course of in vitro pigmentation oscillation. The expression changes are  
942 represented as a heat-map relative to the expression on day 0. Notably Ca14 follows a concordant  
943 pattern of expression with the pigmentation genes.
- 944 B. Western blot analysis of CA14, Mitf and normalization by Tubulin, on treatment with Mitf  
945 inducers 60 $\mu$ M Isobutyl methyl xanthine (IBMX) and 600nM alpha-melanocyte stimulating  
946 hormone ( $\alpha$ -MSH) for 48 and 72h in Melan-A cells. Fold change with respect to control untreated  
947 cells normalized to tubulin expression is depicted as numbers below each lane.
- 948 C. Western blot analysis of CA14, Mitf and normalization by Tubulin, on treatment with MITF  
949 inducer Isobutyl methyl xanthine (IBMX) for 48h in primary human melanocytes. Fold change  
950 with respect to control untreated cells normalized to tubulin expression is depicted below each  
951 lane.
- 952 D. qRT-PCR for *ca14*, *mitf*, *dct*, *trp1* and *tyr* transcripts upon treatment with  $\alpha$ -MSH for 12 and 24h  
953 in Melan-A cells. Fold change is depicted (mean  $\pm$  SEM, n=2) calculated using *18s rrna* as the  
954 reference.
- 955 E. Dual luciferase assay performed with IBMX for 24h on B16 cells transfected with luciferase  
956 construct (pGL4.23) containing 3kb upstream region of *ca14* promoter, or the transcription start  
957 sites proximal 1kb, middle, or the distal 1 kb region of the promoter. Renilla luciferase driven by  
958 cytomegalovirus promoter (pGL4.75) was used for reference. Error bars represent SEM across  
959 three independent experiments. IBMX responsive region appears to be in the 1kb proximal as  
960 well as distal regions of the promoter.
- 961 F. Chromatin Immunoprecipitation using Mitf antibody (C5) or normal mouse IgG control, was  
962 followed by qRT-PCR performed for mitf binding sites in Ca14 promoter and intron region.  
963 Graphs are plotted as percent input. Trp1 and cdk2 were taken as positive control. Bars represent  
964 mean  $\pm$  SEM across two biological replicate experiments.

pH regulates melanocyte maturation

965 G. Western blot analysis of Ca14, Mitf and Dct normalized to Gapdh upon knockdown using *Mitf*  
966 siRNA in Melan-A cells.

967 H. Western blot analysis of CA14 and MITF normalized to tubulin upon knockdown using *MITF*  
968 siRNA in primary human melanocytes.

969

970 **Fig 3: Transient silencing of *Ca14* in Zebrafish decreases melanocyte maturation**

971 A. Brightfield images of the lateral view of control and Ca14 morphant embryos at 48 hours post  
972 fertilization (hpf). The black structures observed are melanophores, the melanin containing cells  
973 equivalent to mammalian melanocytes. These are pale in the morphants. Scale bar 100  $\mu$ m.

974 B. Representative fluorescence images of control and Ca14 morphant embryos at 48 hours post  
975 fertilization (hpf) from *ftyrp1*:GFP line, wherein the melanocytes are marked by the expression of  
976 GFP. Number of melanocytes remain unaffected in the morphants.

977 C. Melanin quantitation from the bright field images of control and Ca14 morphants carried out  
978 using Image J platform. The mean grey values are inversely linked to melanin content of the  
979 embryo, and are represented as scatter plot across melanophores from multiple animals.

980 D. Number of *ftyrp1* promoter driven GFP positive melanophores from control and Ca14 morphant  
981 embryos at 48 hours post fertilization remains unchanged.

982 E. qRT-PCR quantification of pigmentation genes tyrosinase (*tyr*), F. dopachrome tautomerase (*dct*)  
983 and G. tyrosinase related protein 1b (*tyrp1b*) between control and ca14 morphants at 36 and 48  
984 hpf, compared to 24 hpf using beta-actin as the normalization reference. Error bars represent  
985 SEM across three independent experiments normalized to corresponding control MO set with  
986 RPS11 as the normalization control.

987

988

989

990 **Fig 4: CA14 causes increase in intracellular pH observed during pigmentation program**

- 991 A. Western blot analysis of CA14 normalized to tubulin during pigmentation. Indicated days (day 0,  
992 4, 6 and 8) represent number of days after initiating the pigmentation program in the pigment  
993 oscillator model. Numbers indicate normalized fold change *wrt* to tubulin with day 0 as the  
994 reference.
- 995 B. Intracellular pH ( $\text{pH}_i$ ) probed by ratiometric pH sensitive fluorescent dye BCECF-AM in B16-  
996 melanoma cells during different days of pigmentation. The data represents mean  $\pm$  standard  
997 deviation of at least 100 randomly chosen cells. Statistical analysis was performed using unpaired  
998 t test across three independent biological replicates. The trend in  $\text{pH}_i$  follows Ca14 expression in  
999 5%  $\text{CO}_2$  condition. While pigmentation conducive 5%  $\text{CO}_2$  shows an increase in  $\text{pH}_i$ , the non-  
1000 conducive 10%  $\text{CO}_2$  does not show the elevation in  $\text{pH}_i$ .
- 1001 C. Western blot analysis of Ca14 normalized to tubulin on day 4 and day 8 of pigmentation from  
1002 cells grown at 5% and 10%  $\text{CO}_2$  respectively. Please note that the normalization blot for tubulin  
1003 represented here is also depicted in Fig 1D. The increase in Ca14 expression on day 4 is evident  
1004 under both conditions, thereby prevailing  $\text{CO}_2$  levels in this system drives  $\text{pH}_i$  changes.
- 1005 D.  $\text{pH}_i$  probed by BCECF-AM in B16-melanoma cells on siRNA knockdown of *cal4* and on  
1006 overexpression of wild type or the catalytically inactive form (CA14<sub>T199I</sub>). The data represents  
1007 mean  $\pm$  standard deviation of at least 30 transfected cells. Statistical analysis was performed using  
1008 unpaired t test. The data is representative of two experimental sets.
- 1009 E. Confocal image of immunocytochemistry using CA14 antibody (green) on permeabilized B16  
1010 melanoma cells, counter stained by PI (red). Nuclear localization of the Ca14 signal is evident.
- 1011 F. Western blot analysis of subcellular fractions enriched in nucleus and melanosome, using CA14  
1012 antibody. H2AZ antibody was used as a marker for nuclear and DCT for melanosomal  
1013 enrichments.

1014

1015 **Fig 5: CA14 brings about transcriptional regulation of downstream pigmentation genes through**  
1016 **histone acetylation**

1017 A. Western blot analysis of Dct, Gp100 and Mitf proteins along with Ca14 and tubulin upon  
1018 knockdown using *Cal4* shRNA in B16 cells. Numbers represent tubulin normalized fold changes  
1019 wrt control non-targeting ShRNA.

1020 B. Gene expression analysis using qRT-PCR of Ca14 and Dct, upon *cal4* knockdown using shRNA  
1021 in B16 cells. Fold change normalized to *gapdh* wrt control non-targeting ShRNA. Bars represent  
1022 mean  $\pm$  SEM across 4 independent biological replicates.

1023 C. Luciferase assay of *Dct* promoter cloned downstream of firefly luciferase (pGL4.23), on  
1024 knockdown using *cal4* shRNA. Bars represent mean  $\pm$  SEM across 3 independent biological  
1025 replicates.

1026 D. Western blot analysis was carried out for specific acetylation of histones (H3K27, H2A.Z, H4K12,  
1027 H2AK5 and H3K9) in Ca14 knockdown B16 melanoma cells. Bars represent log normalized fold  
1028 changes wrt control non-targeting shRNA of mean  $\pm$  SEM across 2 independent biological  
1029 replicates.

1030 E. Representative western blot of acetylations in histone H3.

1031 F. Chromatin Immunoprecipitation using acetylated H3K27 antibody or normal rabbit IgG as a  
1032 control on day 4 pigmenting cells of the oscillator in control non-targeting ShRNA and Ca14  
1033 shRNA transfected cells. qRT-PCR was performed for select promoters in the immunoprecipitate  
1034 and input DNA. Relative normalized percent input DNA under each promoter is depicted as a  
1035 heat-map.

1036 G. Histone acetyl transferase (HAT) activity as a function of pH for recombinant HAT domain of  
1037 p300 protein is depicted. Compared to the HAT activity at pH 7.15, the activity at pH 7.95 was  
1038 almost 8 fold.

pH regulates melanocyte maturation

- 1039 H. Cell pellets and real-time qRT-PCR levels of pigmentation transcripts *Dct*, *Tyr*, *Gp100* and *MITF*  
1040 upon selective inhibition of p300/CBP HAT activity in B16 cells. p300 HAT inhibition resulted  
1041 in depigmented cells with a decrease in pigmentation gene transcripts.
- 1042 I. Proposed model of melanocyte maturation depicts *Mitf* mediated induction of *Ca14*, which  
1043 increases intracellular pH ( $\text{pH}_i$ ) and changes chromatin activation marks (AcH3K27) on selective  
1044 pigmentation genes, amplifying their expression by *MITF*.

1045

1046 **Fig 6: Targetted null mutation of *Ca14* by CRISPR demonstrates immature acidic melanocytes**

- 1047 A. Brightfield images of the lateral view of CRISPR targeted mutant *ca14*<sup>fs003</sup> and control embryos at  
1048 36 hours post fertilization (hpf) in F2 generation fishes. Scale bar 100  $\mu\text{m}$ .
- 1049 B. Wildtype and *ca14*<sup>fs003/-</sup> adult male animals were dark adapted for 24h. Image of the lateral view  
1050 was captured under identical lighting and image capture settings.
- 1051 C. Zoomed up portion from the fourth lateral line demonstrates melanophores to be laden with less  
1052 melanin content in the mutant animal.
- 1053 D. qRT-PCR quantification of pigmentation genes *tyrosinase* (*tyr*), *dopachrome tautomerase* (*dct*),  
1054 *tyrosinase related protein 1b* (*tyrp1b*) and *microphthalmia associated factor a* (*mitfa*) between  
1055 control and *ca14*<sup>fs003</sup> at 36 hpf, using *rps11* gene as the normalization reference. While *mitfa*  
1056 remains unaffected all other pigmentation genes are downregulated in the absence of functional  
1057 *ca14*.
- 1058 F. Intracellular  $\text{pH}_i$  probed by BCECF-AM in *ca14*<sup>fs003</sup> and sibling control zebrafish embryos.  
1059 Readings were obtained from trunk region melanophores. n = 3 expts, at least 10 embryos each.  
1060 A decrease in the ratio indicates acidification of melanocytes.
- 1061 G. Wild type as well as embryos obtained from the cross of *ca14*<sup>fs003/-</sup> and *ca14*<sup>fs003+/-</sup> were left  
1062 uninjected or treated with embryo water buffered at pH 10.0 (between 18hpf till 36 hpf) or  
1063 injected with 10 pg of in vitro transcribed mouse *Ca14* mRNA. Embryos were scored for

pH regulates melanocyte maturation

1064 pigmentation at 36 hpf. Ratios represent number of less pigmented phenotypic embryos to the  
1065 total number of embryos scored. The proportion of less pigmented animals decreased upon  
1066 mouse Ca14 mRNA injection as well as increased extracellular alkalinization.

1067

1068 **Supplementary Information**

1069 **SUPPLEMENTARY FIGURE LEGENDS:**

1070 **Fig S1: 10% CO<sub>2</sub> leads to extracellular acidification leading to decreased melanin content**  
1071 **and increased proliferation**

1072 A. Line graph showing extracellular pH at various days of pigmentation in 5% and 10% CO<sub>2</sub>  
1073 cultured B16 cells.

1074 B. Bar graph depicts the colorimetric melanin estimation of B16 melanoma cells cultured under  
1075 5% CO<sub>2</sub> and 10% CO<sub>2</sub> growth conditions for indicated days using synthetic melanin as a  
1076 standard. Error bars represents independent biological replicate, n=3.

1077 C. Alteration of cellular pH by the modulation of CO<sub>2</sub> results in changes in cell proliferation in  
1078 B16 cells as measured by cell count.

1079 **Fig S2: Gene expression data analysis from pigmentation models to identify putative**  
1080 **effectors of melanocyte differentiation**

1081 B16 melanoma cells were made to transit between pigmented (differentiated) state and  
1082 depigmented state state, using two methods: by passaging the depigmented cells in mouse as a  
1083 tumor and culturing the cells in vitro. Microarray was performed on the four different *in vitro*  
1084 passages (P1 to P4). Depigmented B16 cells were cultured *in vitro* at a low density and allowed  
1085 to pigment for 12 days and to depigment for the next 8 days for two cycles. Microarray was  
1086 carried out from Day 0 depigmented Day 4, Day 8 and Day 12 (pigmented) and Day 16 and Day

1087 20 (depigmented). Expression profiles of genes that showed a concomitant pattern of regulation  
1088 across both models of melanocyte differentiation is listed. (GSE54359).

1089 **Fig S3: Validation of Ca14 antibody used in the study**

1090 A. Blots depicting the levels of Ca14 protein upon Ca14 siRNA mediated knockdown. Tubulin  
1091 was used as normalizing control.

1092 B. Blots depicting the levels of Ca14 protein upon overexpression. Tubulin was used as  
1093 normalizing control.

1094 **Fig S4: M box sequences in Human and Mouse ca14 promoter and genic regions.**

1095 **Fig S5: mRNA expression of carbonic anhydrase 14 during pigmentation**

1096 Bar graph depicting the relative mRNA levels of Ca14 during pigmentation in mouse B16  
1097 melanoma cells. Error bars represent SEM from biological replicates across three different  
1098 experiments.

1099 **Fig S6: Changes in CA14 expression correlate with pigmentation status of primary human  
1100 melanocytes**

1101 A. Confocal image of Normal Human Epidermal Melanocytes (NHEM) cultured under different  
1102 media conditions using MBM4 and M254 media available commercially. B16 cells were  
1103 stained using for CA14 antibody (green) and the nucleus is counter stained using DAPI  
1104 (blue).

1105 B. Protein levels of CA14 probed by western blot analysis in NHEM grown under different  
1106 media conditions that retain melanocytes in a proliferative condition (MBM-4 medium with  
1107 phorbol myristyl acetate (PMA)) and M254 (without PMA) that facilitates pigmentation.

1108 **Fig S7: ca14 morpholino causes pigmentation phenotype without affecting the survival of  
1109 embryos**

1110 A. Percentage phenotype in Ca14 morpholino injected embryos w.r.t control morpholino  
1111 represented as bar graph. Error bars represent SEM across four independent experiments.

1112 B. Percentage survival in Ca14 morpholino injected embryos w.r.t control morpholino  
1113 represented as bar graph. Error bars represent SEM across four independent experiments.

1114 **Fig S8: Schematic of zebrafish gene ca14 depicting that CRISPR target region and the**  
1115 **observed mutation in ca14<sup>fs003</sup>**

1116

1117 **Supplementary Table 1**

1118 Excel sheet containing

1119 A. Sequences of primers

1120 B. qRT-PCR TAQMAN probes

1121 C. siRNA and shRNA catalog numbers

1122 D. Antibody catalog numbers and dilutions used in this study.



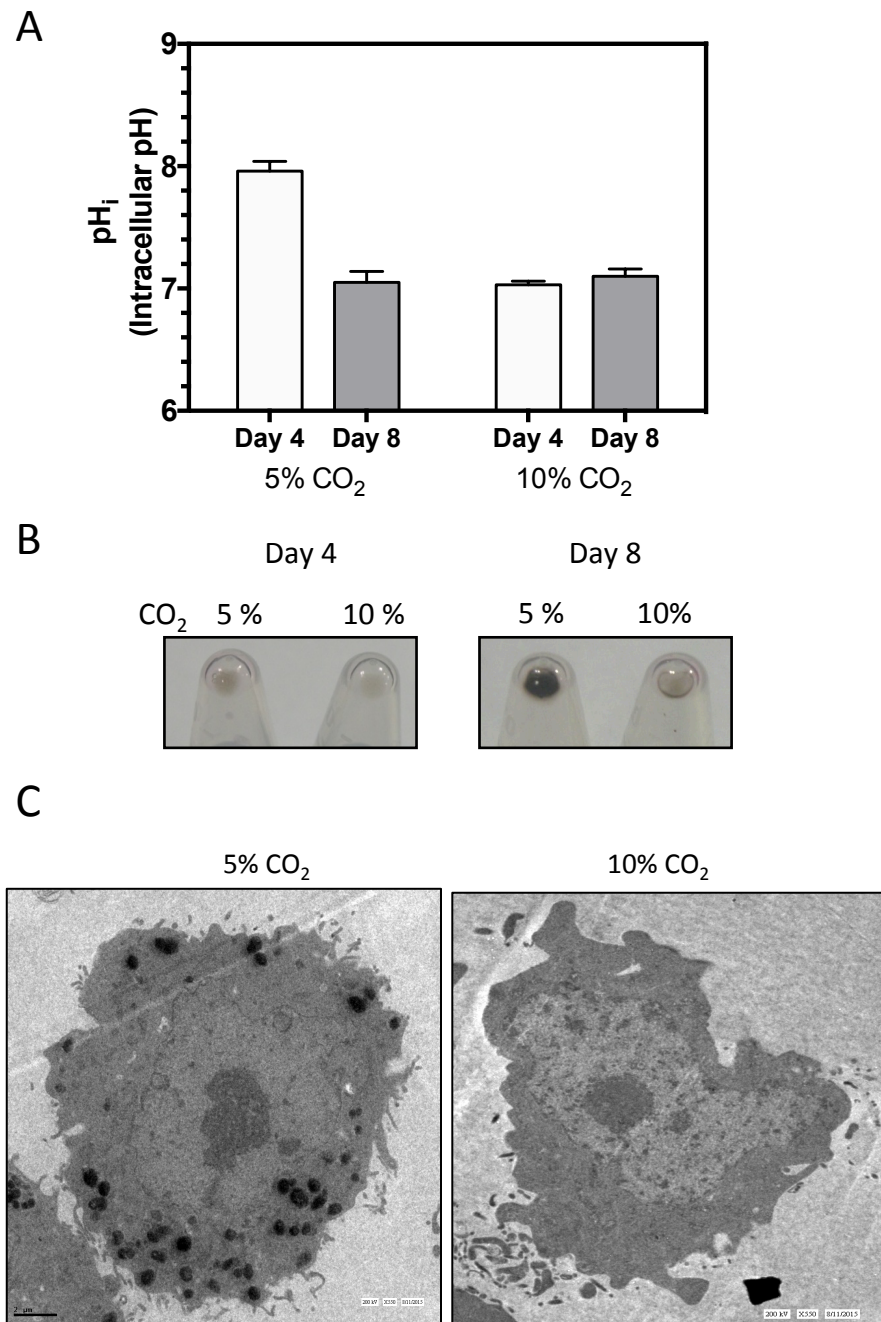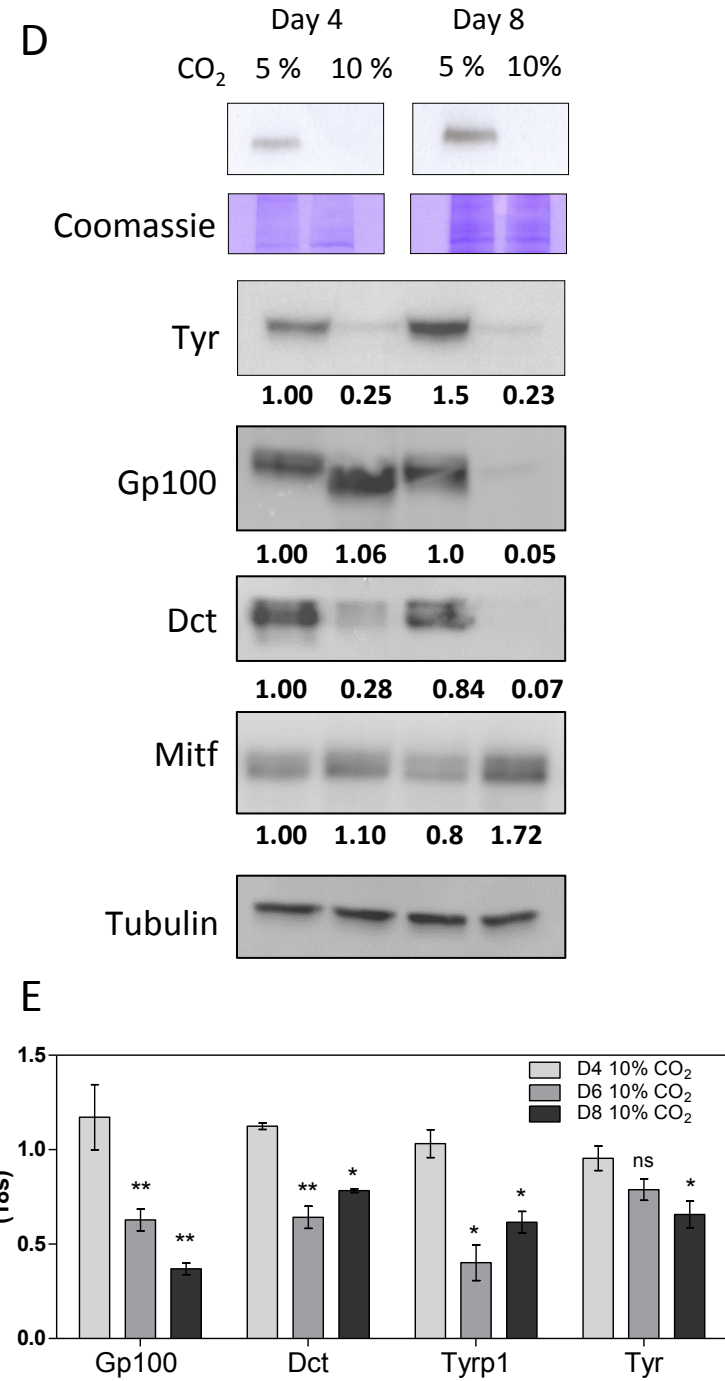

Fig 1

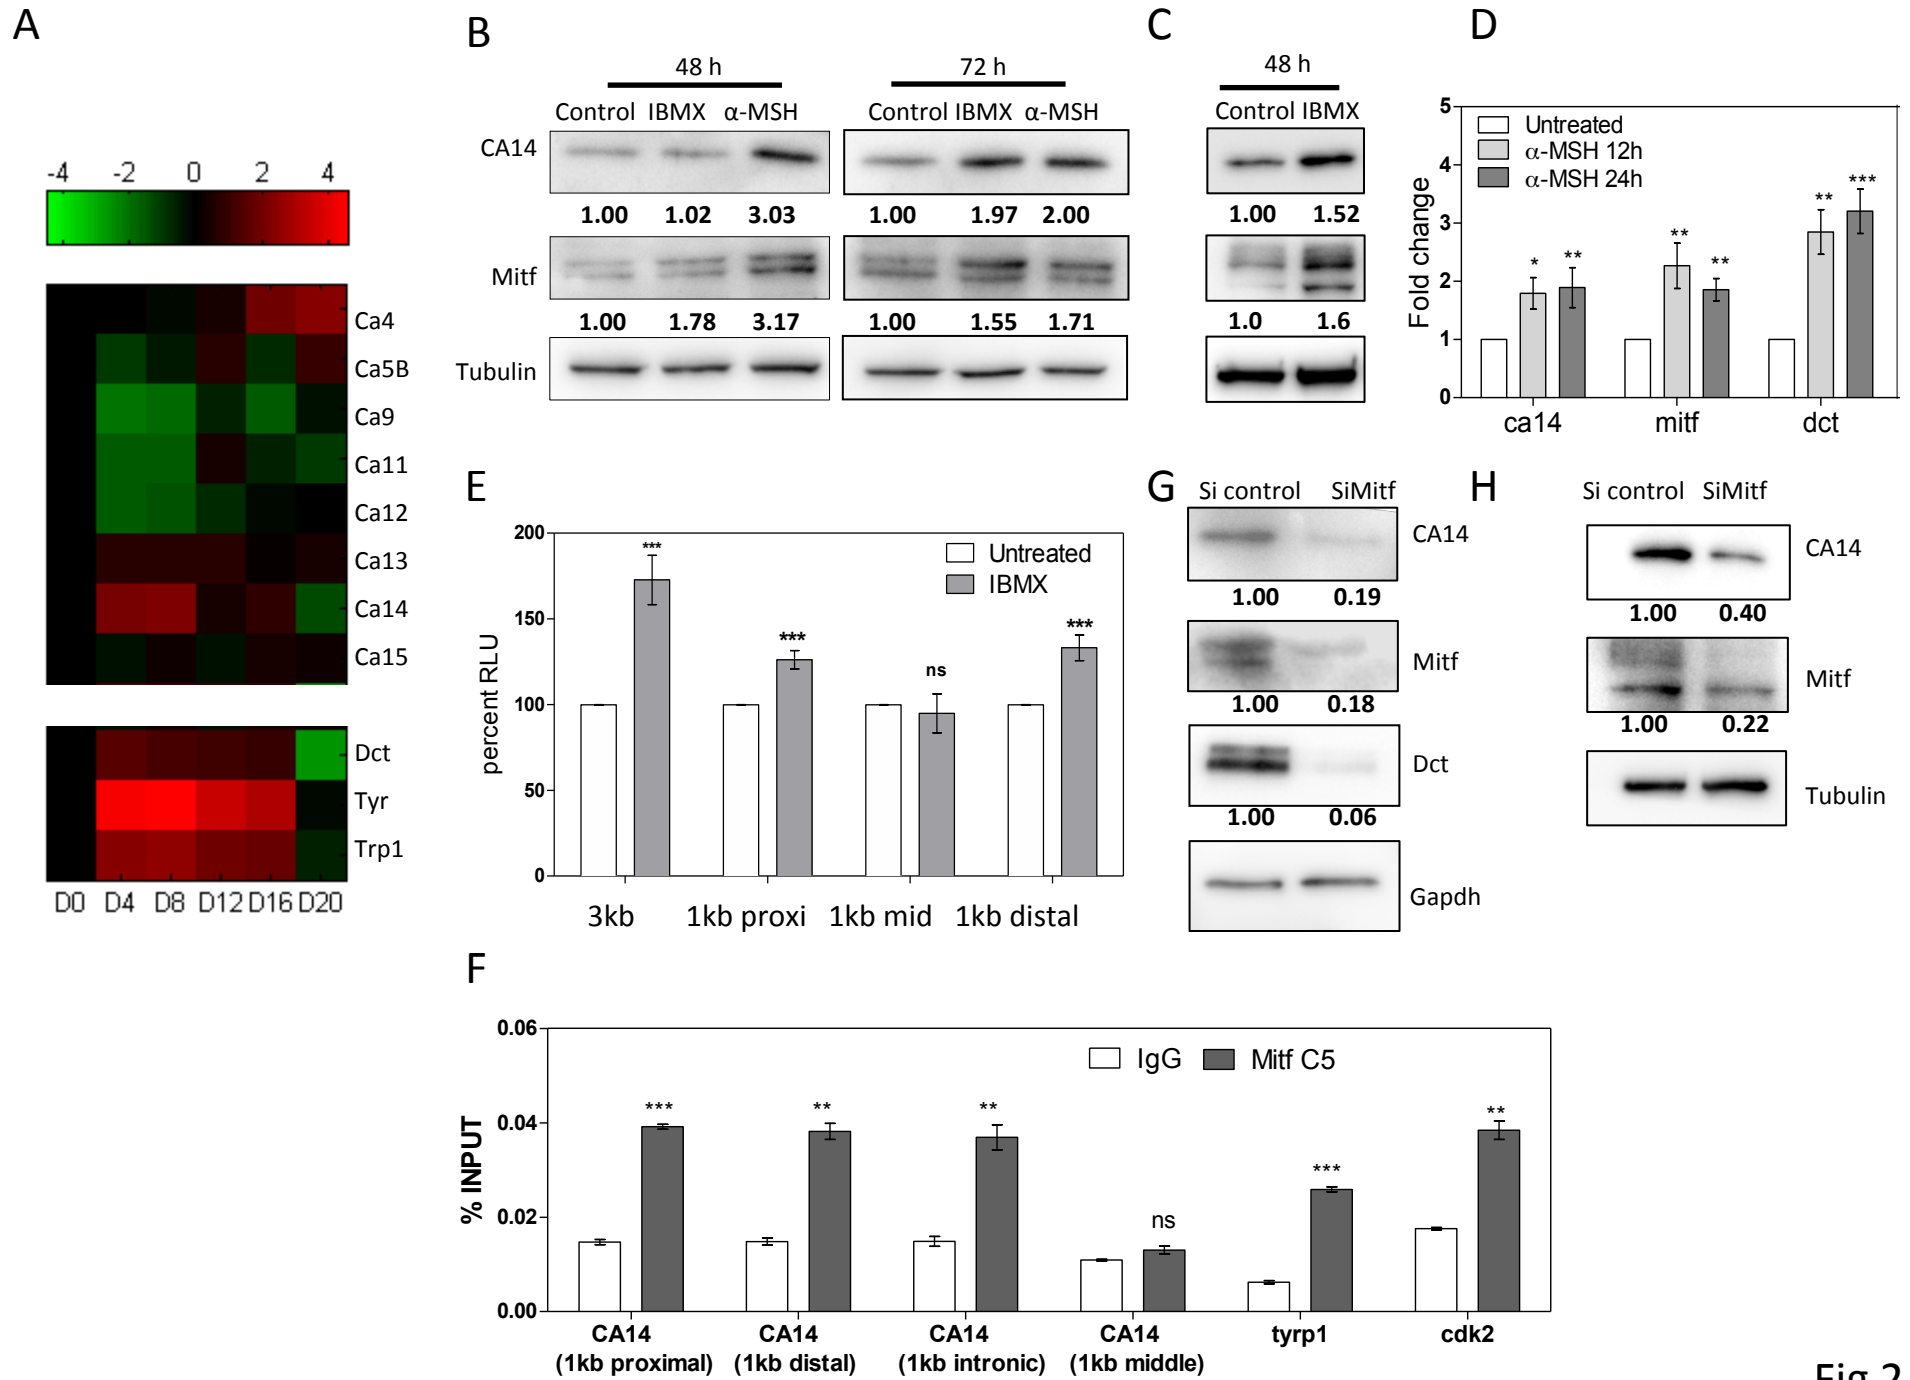

Fig 2

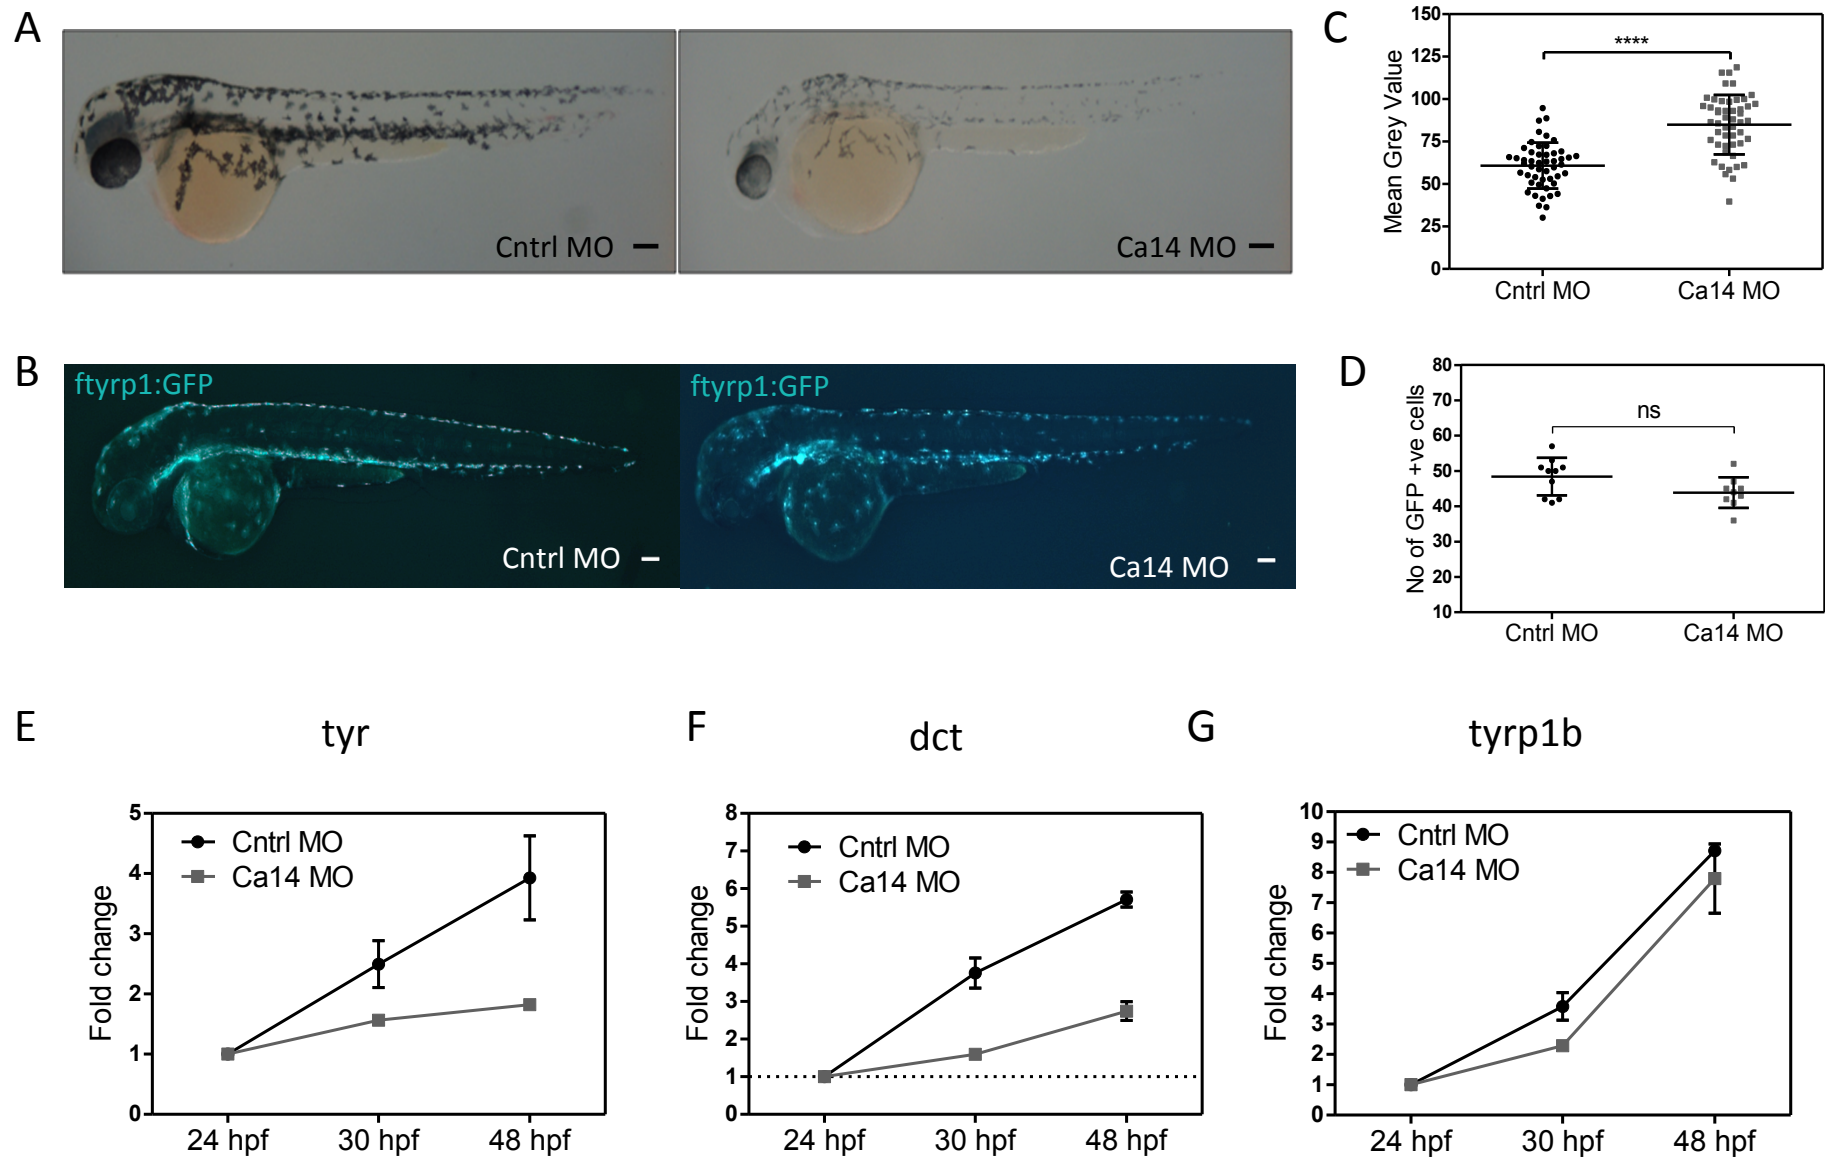

Fig 3

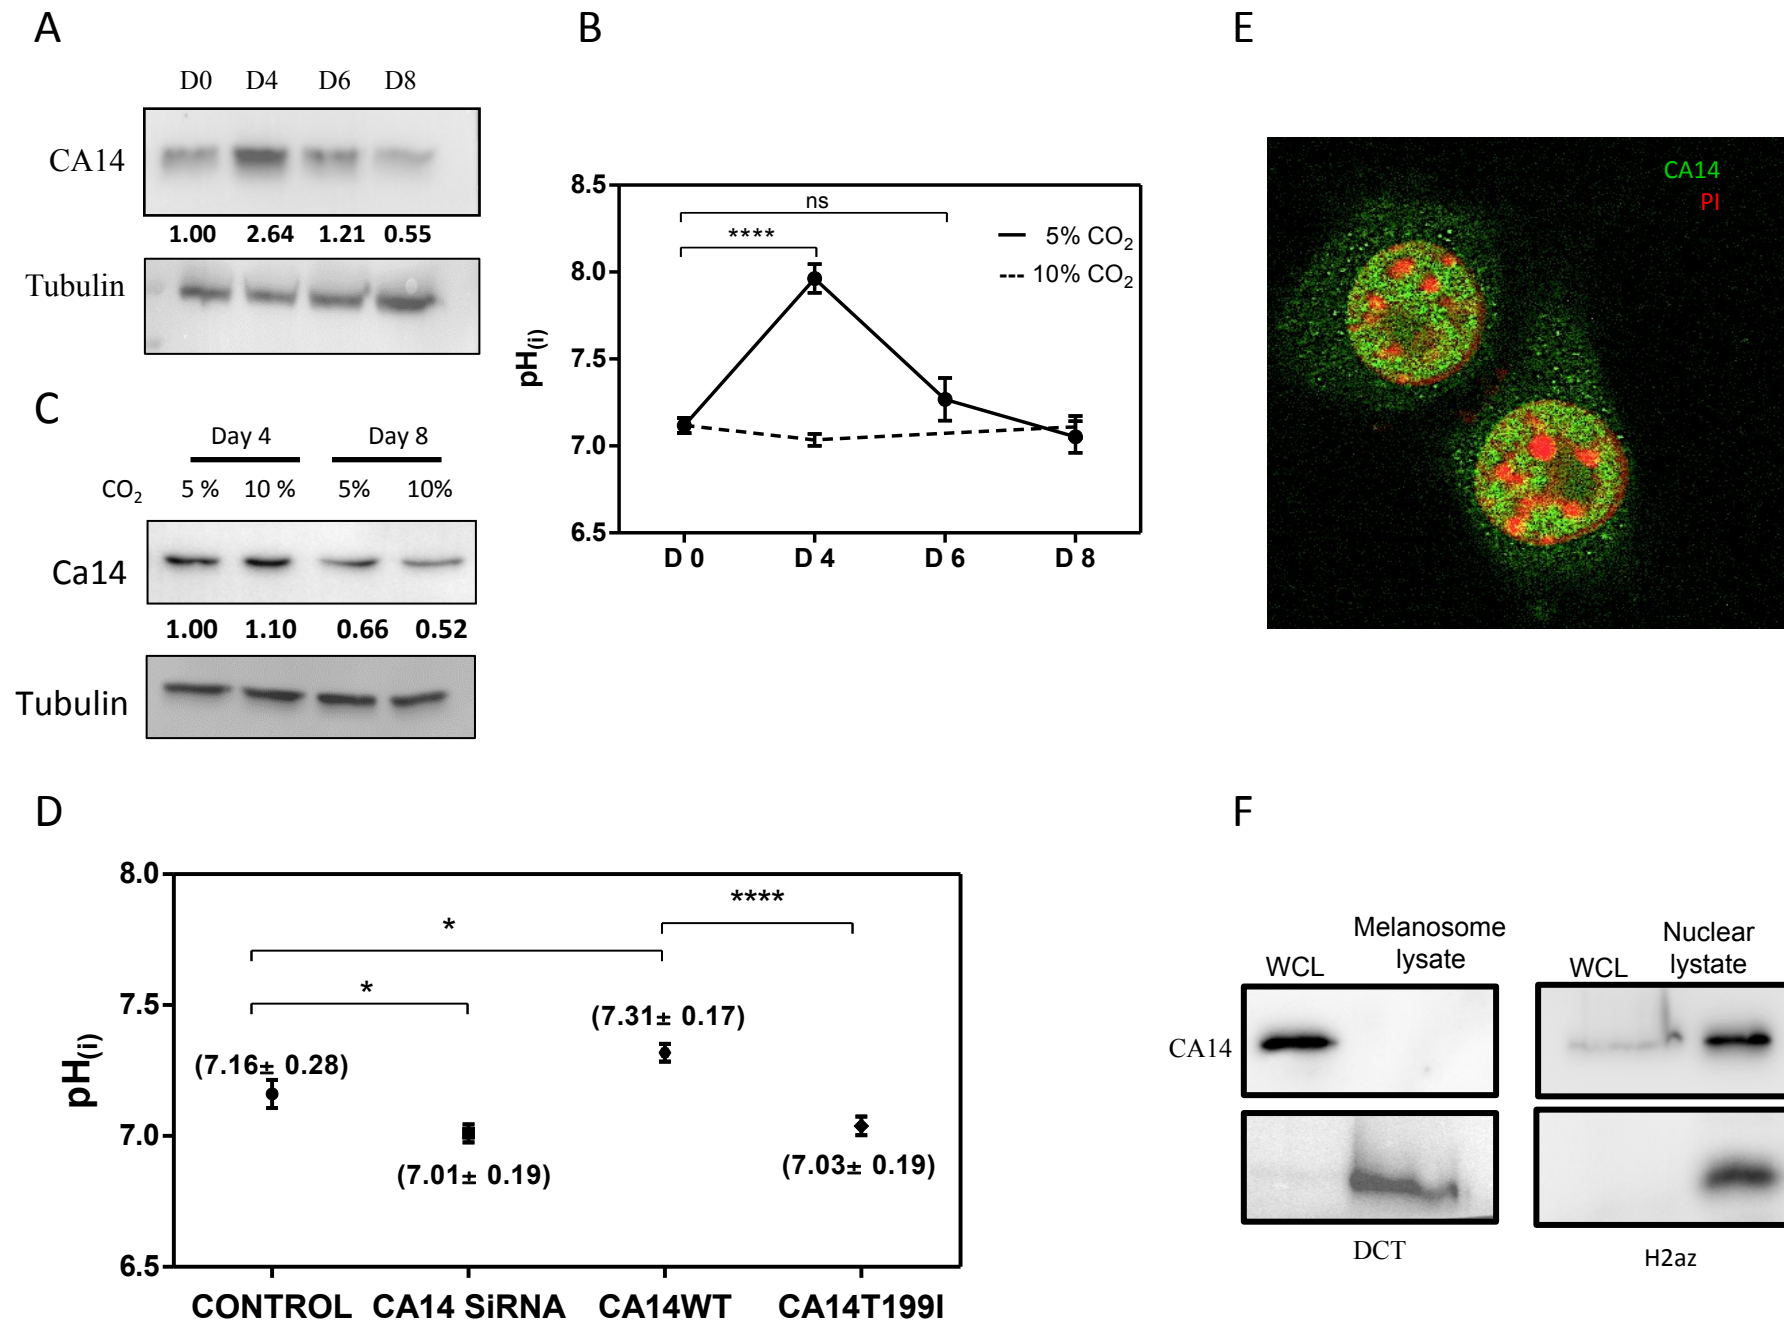

Fig 4

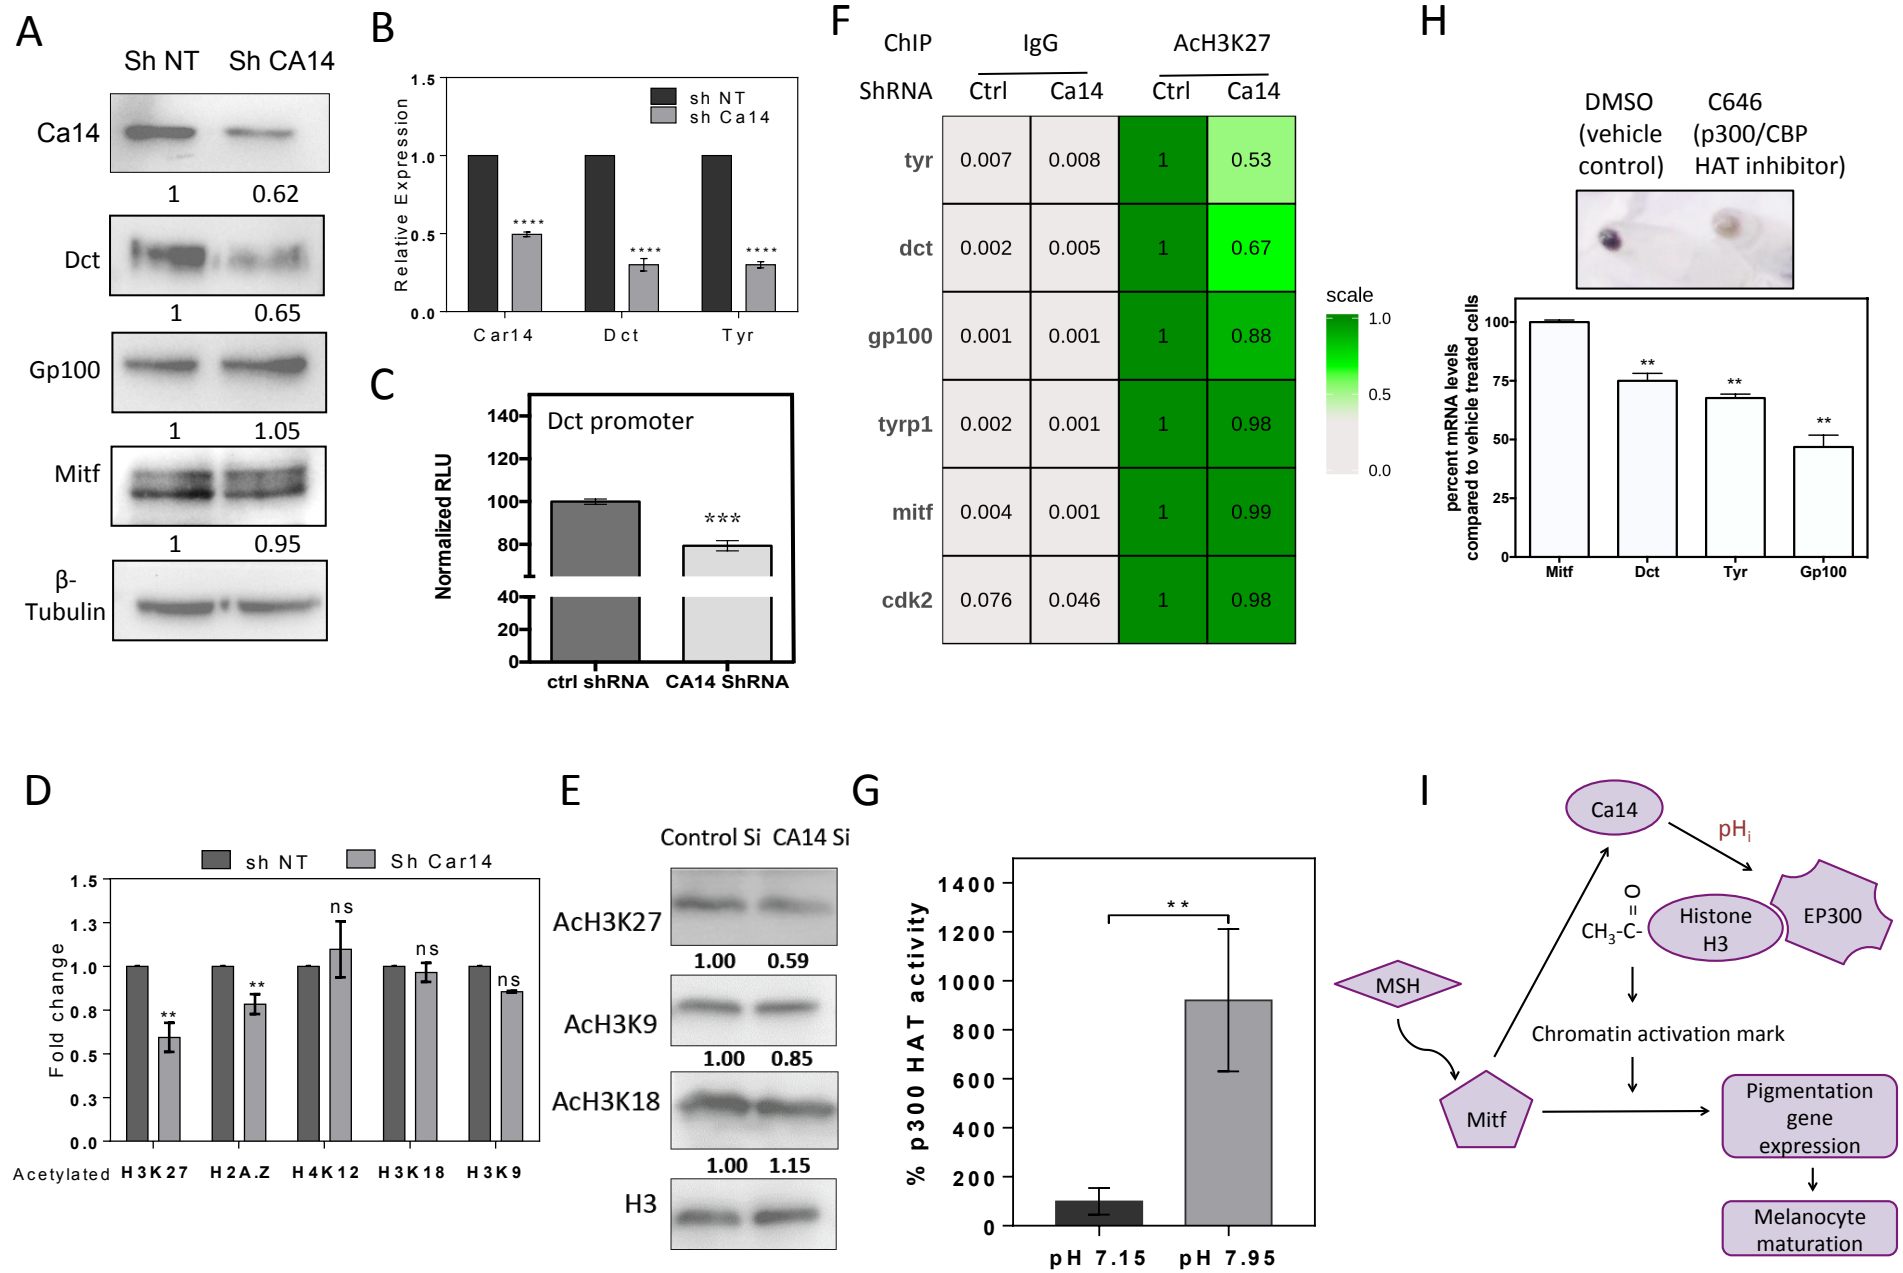

Fig 5



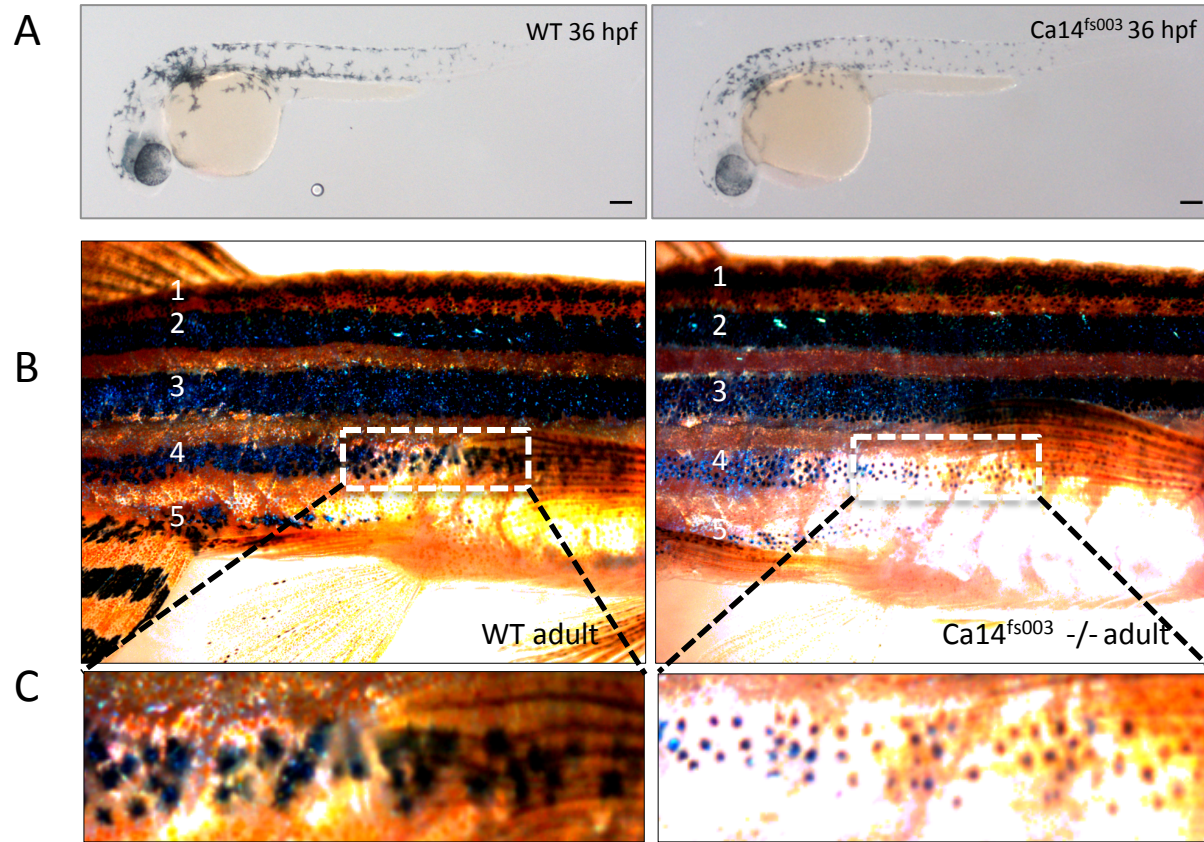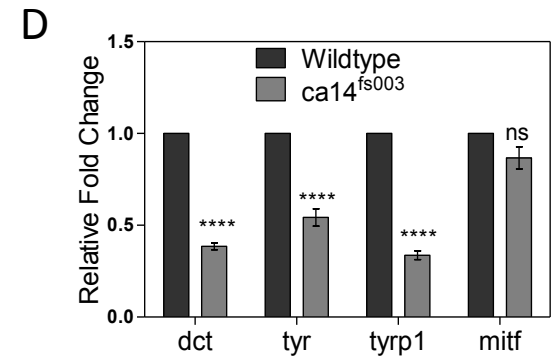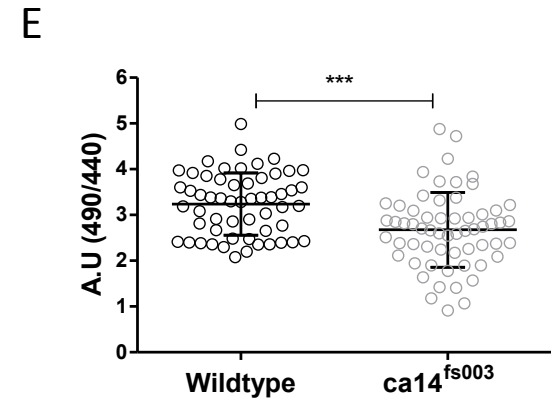

**F**

| Treatment          | number of phenotypic animals with less pigmented melanophores / total embryos analyzed |                                         |
|--------------------|----------------------------------------------------------------------------------------|-----------------------------------------|
|                    | WT X WT                                                                                | $Ca14^{fs003} +/-$ X $Ca14^{fs003} -/-$ |
| Uninjected         | 1/57                                                                                   | 30/64                                   |
| mCA14 mRNA (10 pg) | 0/67                                                                                   | 17/52                                   |
| pH 10.0 treatment  | 0/70                                                                                   | 16/51                                   |

Fig 6

# pH controlled histone acetylation amplifies melanocyte differentiation program downstream of MITF

Desingu Ayyappa Raja<sup>1, 2\*</sup>, Vishvabandhu Gotherwal<sup>1, 2\*</sup>, Yogaspoorthi J Subramaniam<sup>1, 2</sup>, Farina Sultan<sup>1,2,3</sup>, Archana Vats<sup>2</sup>, Archana Singh<sup>1,2</sup>, Sridhar Sivasubbu<sup>1</sup>, Rajesh S Gokhale<sup>3</sup> and Vivek T Natarajan<sup>1, 2‡</sup>

---

## Supplementary Information

- Fig S1:** 10% CO<sub>2</sub> leads to extracellular acidification leading to decreased melanin content and increased proliferation
- Fig S2:** Gene expression data analysis from pigmentation models to identify putative effectors of melanocyte differentiation
- Fig S3:** Validation of Ca14 antibody used in the study
- Fig S4:** M-box sites in mouse and human Ca14 promoter and genic regions
- Fig S5:** mRNA expression of carbonic anhydrase 14 during pigmentation
- Fig S6:** Changes in CA14 correlate with pigmentation status of primary human melanocytes
- Fig S7:** ca14 morpholino causes pigmentation phenotype without affecting the survival of embryos
- Fig S8:** Schematic of zebrafish gene ca14 depicting the CRISPR target region and the observed mutation in ca14<sup>fs003</sup>.

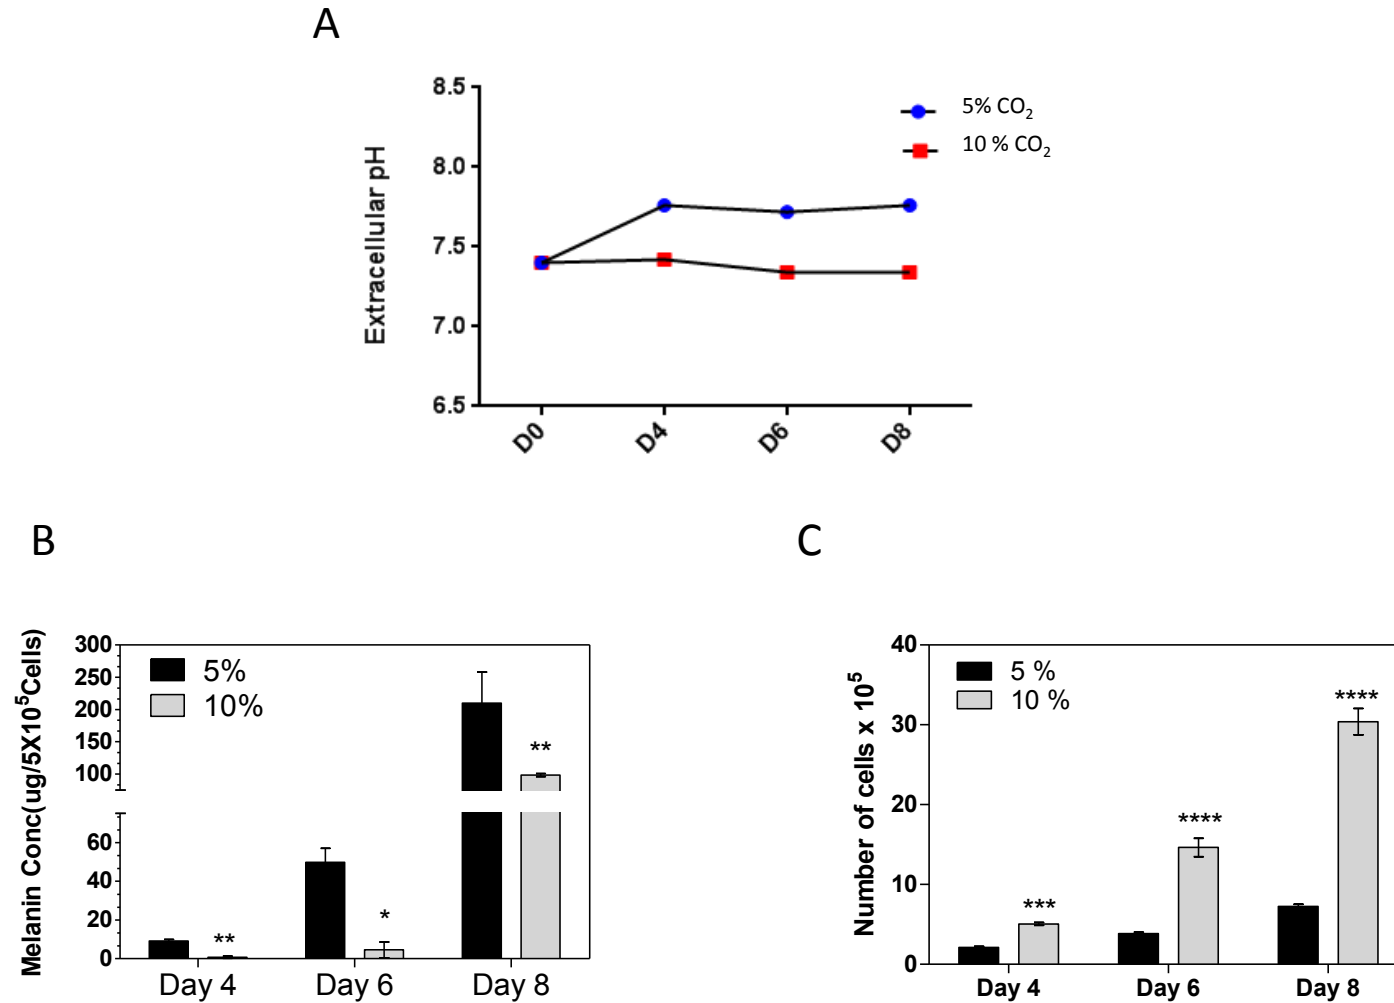

**Fig S1: 10% CO<sub>2</sub> leads to extracellular acidification leading to decreased melanin content and increased proliferation**



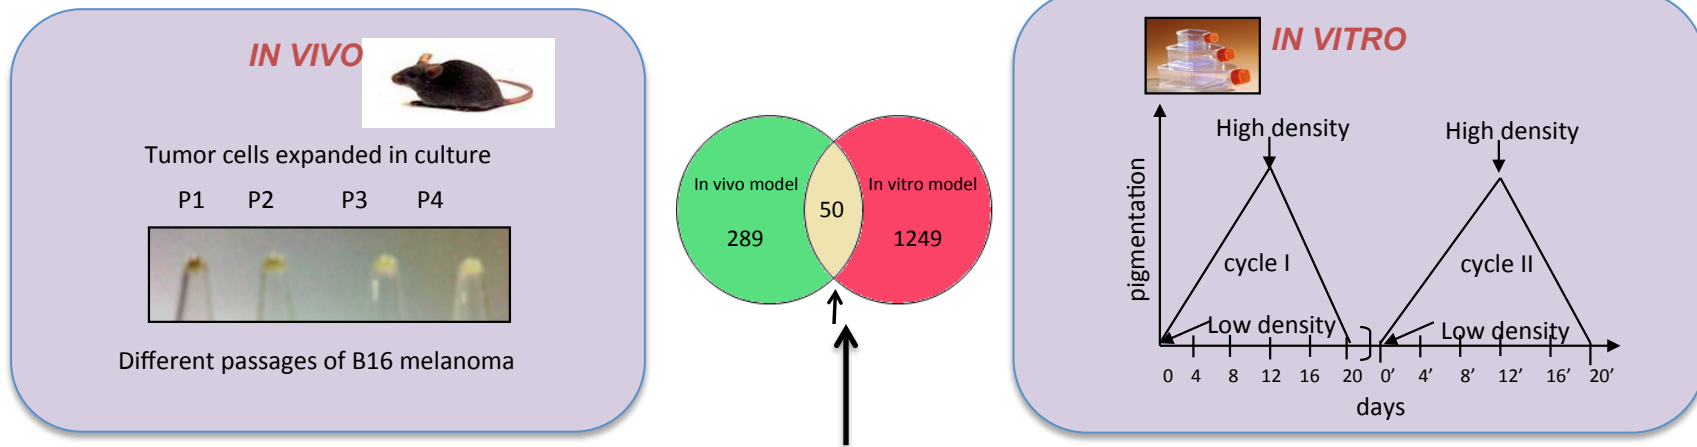

Potential regulators of melanocyte differentiation

|                   |                   |                   |                   |        |               |           |        |                   |        |
|-------------------|-------------------|-------------------|-------------------|--------|---------------|-----------|--------|-------------------|--------|
| 0610011F0<br>6Rik | 5031439G<br>07Rik | 9930108O<br>06Rik | A830073O<br>21Rik | Bcl6   | Bfsp2         | Bglap-rs1 | Bglap2 | C130078N1<br>7Rik | Camk2d |
| H2afz             | Ifitm3            | Irf1              | Kdelr3            | Kif1b  | LOC38070<br>6 | Mcc       | Mcoln3 | Mlana             | Mvp    |
| D10Ertd61<br>0e   | D11Lgp2e          | D14Ertd66<br>8e   | Daam1             | Dlgap4 | Gadd45a       | Gsta1     | Gsta2  | Gsta3             | H2-Q5  |
| Plxnd1            | Rab11fip5         | Rab27a            | Rapsn             | Rrm2   | Si            | Socs3     | Syt9   | Tgfb3             | Tyr    |
| Ca14              | Catnb             | Cdk2              | Nap1l1            | Ndr2   | Nos3          | H2-T23    | Aph1a  | Tyrp1             | Vcl    |

**Fig S2: Gene expression data analysis from pigmentation models to identify putative effectors of melanocyte differentiation**

A

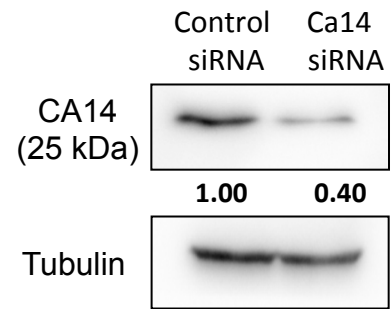

B

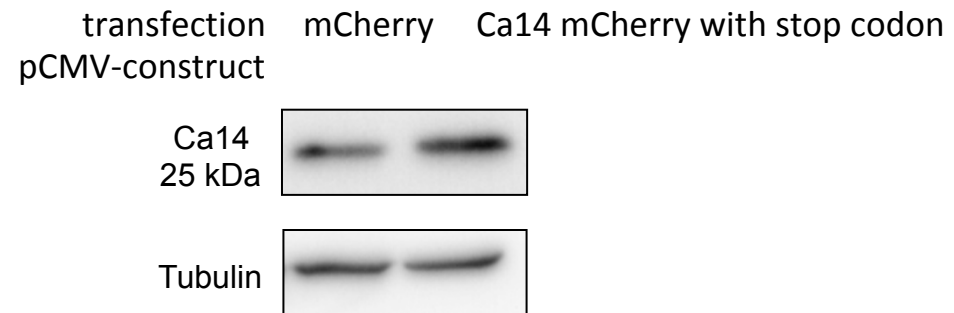

**Fig S3: Validation of Ca14 antibody used in the study**



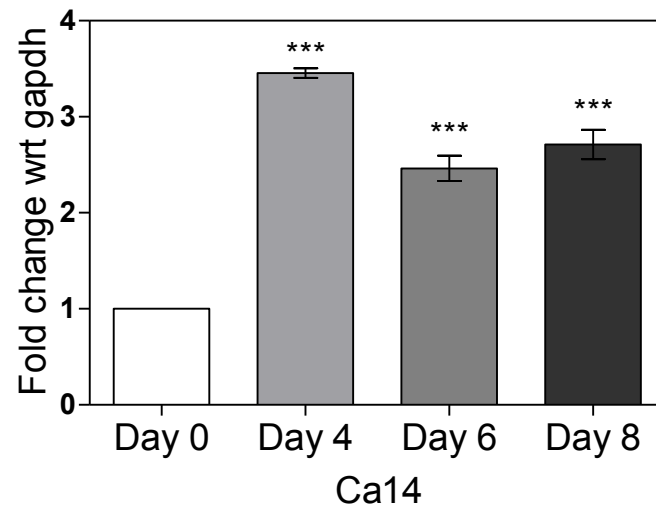

**Fig S5: mRNA expression of carbonic anhydrase 14 during pigmentation**

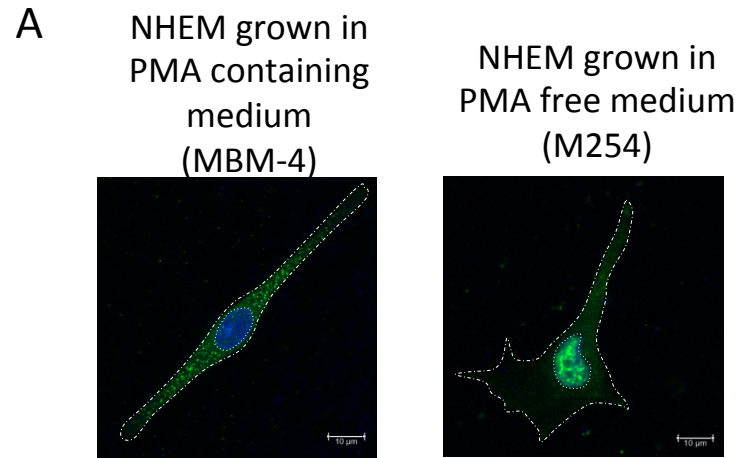

B

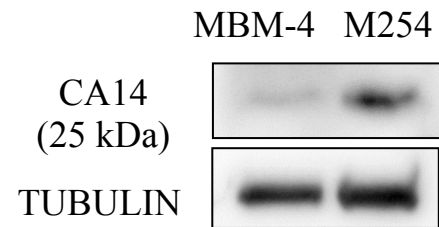

**Fig S6: Changes in CA14 correlate with pigmentation status of primary human melanocytes**

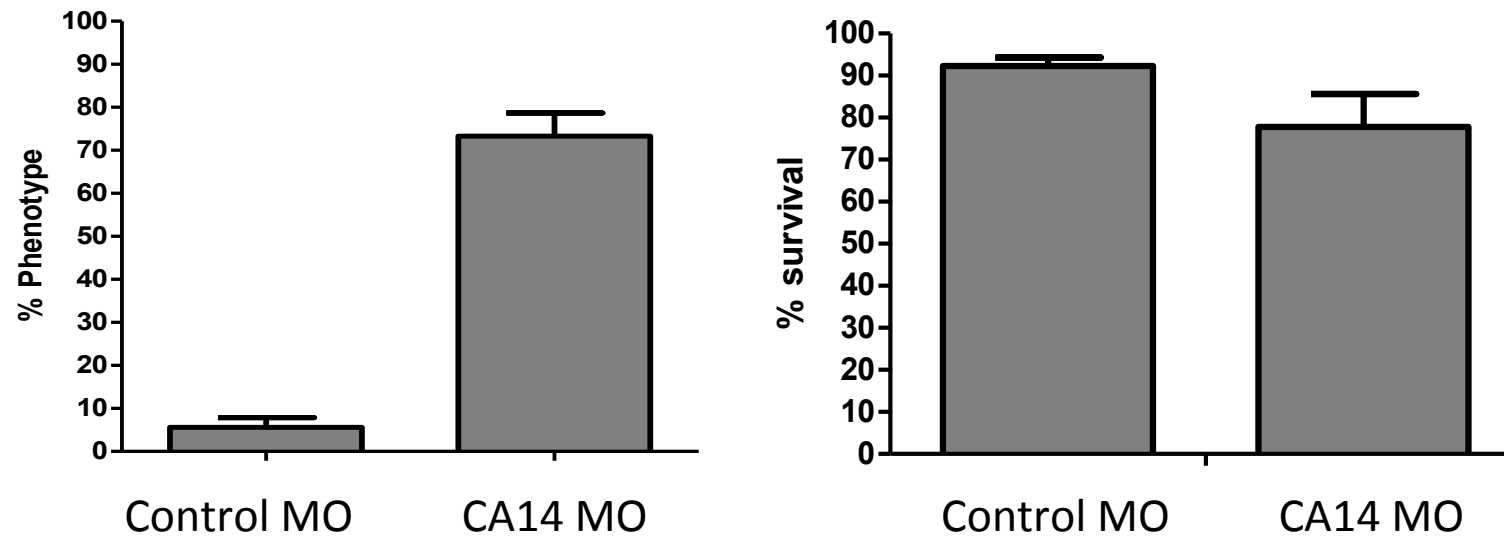

**Fig S7: ca14 morpholino causes pigmentation phenotype without affecting the survival of embryos**

→ Translation start site

|               |                                                                             |       |
|---------------|-----------------------------------------------------------------------------|-------|
|               | *****                                                                       | ***** |
| ca14_wildtype | GGGAGAATAGTGAAATCATGGATCATATCTGGACAACCTTGGCTTTTTCTTTTGTGTTTGAAGTGTGTGGAGTGC |       |
| ca14_mutant   | GGGAGAATAGTGAAATCATGGATCA--TCTGGACAACCTTGGCTTTTTCTTTTGTGTTTGAAGTGTGTGGAGTGC |       |

 PAM sequence  
 sgRNA target sequence

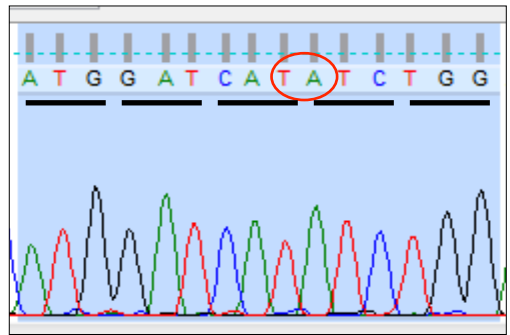

*ca14* wildtype

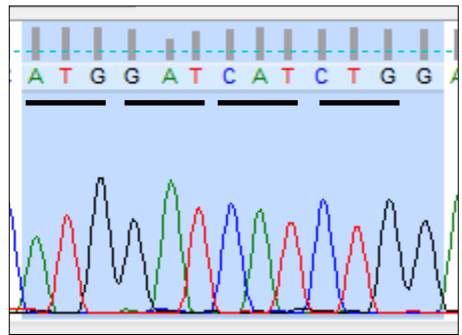

*ca14*<sup>fs003</sup>

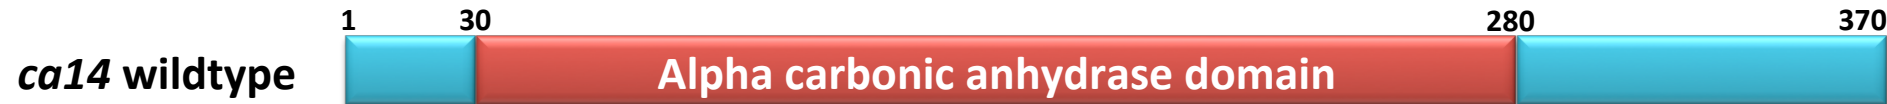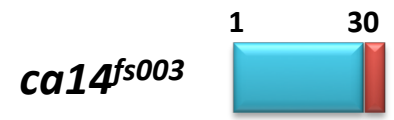

|                              |   |   |   |   |   |   |   |   |   |    |    |    |    |    |    |    |    |    |    |    |    |    |    |    |    |    |    |    |    |    |    |    |    |    |    |    |    |             |
|------------------------------|---|---|---|---|---|---|---|---|---|----|----|----|----|----|----|----|----|----|----|----|----|----|----|----|----|----|----|----|----|----|----|----|----|----|----|----|----|-------------|
|                              | 1 | 2 | 3 | 4 | 5 | 6 | 7 | 8 | 9 | 10 | 11 | 12 | 13 | 14 | 15 | 16 | 17 | 18 | 19 | 20 | 21 | 22 | 23 | 24 | 25 | 26 | 27 | 28 | 29 | 30 | 31 | 32 | 33 | 34 | 35 | 36 | 37 |             |
| <i>ca14</i> wildtype         | M | D | H | I | W | T | T | L | A | F  | S  | F  | V  | L  | K  | C  | V  | E  | C  | S  | G  | S  | A  | T  | K  | W  | T  | Y  | T  | G  | A  | V  | G  | Q  | P  | E  | W  | . . . . .   |
| <i>ca14</i> <sup>fs003</sup> | M | D | H | L | D | N | L | G | F | F  | F  | C  | F  | E  | V  | C  | G  | V  | L  | R  | K  | C  | N  | K  | M  | D  | I  | Y  | R  | C  | C  | G  | T  | T  | R  | M  | D  | <u>STOP</u> |

Fig S8: Schematic of zebrafish gene *ca14* depicting the crispr target region and the observed mutation in *ca14*<sup>fs003</sup>.

| <b>Antibody</b> | <b>Catalog number</b>                      | <b>Company</b>             |
|-----------------|--------------------------------------------|----------------------------|
| ca14            | ab92575                                    | Abcam                      |
| dct             | ab74073                                    | Abcam                      |
| gp100           | ab137078                                   | Abcam                      |
| mitf (C5)       | ab12039                                    | Abcam                      |
| tubulin         | ab21058                                    | Abcam                      |
| gapdh           | ab9385                                     | Abcam                      |
| actin           | ab20272                                    | Abcam                      |
| Ac H2A.Z        | ab18262                                    | Abcam                      |
| H2A.Z           | ab4174                                     | Abcam                      |
| H2AK5           | Acetyl histone antibody sampler kit (9933) | Cell Signalling Technology |
| H2A             | Acetyl histone antibody sampler kit (9933) | Cell Signalling Technology |
| H3K9            | Acetyl histone antibody sampler kit (9933) | Cell Signalling Technology |
| H3              | Acetyl histone antibody sampler kit (9933) | Cell Signalling Technology |
| H4K12           | Acetyl histone antibody sampler kit (9933) | Cell Signalling Technology |
| H4              | Acetyl histone antibody sampler kit (9933) | Cell Signalling Technology |
| H3K27           | ab4729                                     | Abcam                      |
| Mitf C5 sera    | Kind gift from Dr David Fischer            |                            |



**Dilution used in study**

1;750

1;1000

1;1000

1;100

1;10000

1;10000

1;10000

1;1000

1;1000

1;1000

1;1000

1;1000

1;1000

1;1000

1;1000

1;1000

1;100
